# Supplementary material for: Effects of vernal equinox solar eclipse on temperature and wind direction in Switzerland
Source: Copernicus journal article supplement (doi:10.5194/acp-17-14887-2017), 2017-12-18
Supplement: Supplementary file 1 [file acp-17-14887-2017-supplement.pdf]

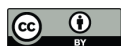

*Supplement of*

## **Effects of vernal equinox solar eclipse on temperature and wind direction in Switzerland**

**Werner Eugster et al.**

*Correspondence to:* Werner Eugster (eugsterw@ethz.ch)

The copyright of individual parts of the supplement might differ from the CC BY 3.0 License.

## List of Tables

|    |                                                                                                                                                                                                                    |   |
|----|--------------------------------------------------------------------------------------------------------------------------------------------------------------------------------------------------------------------|---|
| S1 | Swiss FluxNet sites with high-resolution (20 Hz) turbulent flux measurements and meteorological measurements at the temporal resolution specified in the last column. . . . .                                      | 1 |
| S2 | MeteoSwiss standard weather stations used in this study with temperature drop $\Delta T$ and timing $t(\Delta T)$ (hour:minute CET). Measurement interval was 10 minutes. . . . .                                  | 1 |
| S3 | MeteoSwiss standard weather stations measured wind speed and wind direction and their classification according to topography. Where possible, the orientation of the valley and the slope angle are given. . . . . | 5 |

## List of Figures

|    |                                                                                                                                                                                                                                                                                                                                                                                                                                                                                                                                                                                                  |    |
|----|--------------------------------------------------------------------------------------------------------------------------------------------------------------------------------------------------------------------------------------------------------------------------------------------------------------------------------------------------------------------------------------------------------------------------------------------------------------------------------------------------------------------------------------------------------------------------------------------------|----|
| S1 | Wind direction evolution at MeteoSwiss sites classified as ‘flat’. Black line and gray symbols: day of eclipse (20 March 2015). Light blue line and symbols (19 March 2015) and dark blue line and symbols (18 March 2015): conditions on the days before for comparison. The timing of the first (1) and last (4) contact and the eclipse maximum (M) are shown with vertical lines. Site names and codes correspond to those given in Table S3. The bold lines are local polynomial regression (loess) fits. Note that the y-axis was shifted by 0, 90, 180 or 270° depending on site. . . . . | 8  |
| S2 | As Figure S1, but for sites classified as ‘valley’ sites in rather small valleys (otherwise a site was classified as ‘flat’). . . . .                                                                                                                                                                                                                                                                                                                                                                                                                                                            | 11 |
| S3 | As Figure S1, but for sites classified as ‘mountain or hilltop’ sites. . . . .                                                                                                                                                                                                                                                                                                                                                                                                                                                                                                                   | 13 |
| S4 | As Figure S1, but for sites classified as ‘slope’ sites. . . . .                                                                                                                                                                                                                                                                                                                                                                                                                                                                                                                                 | 16 |

**Table S1.** Swiss FluxNet sites with high-resolution (20 Hz) turbulent flux measurements and meteorological measurements at the temporal resolution specified in the last column.

| CODE   | Site Name        | Ecosystem Type    | Latitude      | Longitude    | Elevation | Met Interval <sup>a</sup> |
|--------|------------------|-------------------|---------------|--------------|-----------|---------------------------|
| CH-AWS | Alp Weissenstein | Alpine Pasture    | 46°34'59.5" N | 9°47'25.5" E | 1978 m    | 10 min                    |
| CH-CHA | Chamau           | Valley Grassland  | 47°12'36.8" N | 8°24'37.6" E | 393 m     | 30 min                    |
| CH-DAV | Davos            | Deciduous Forest  | 46°48'55.2" N | 9°51'21.3" E | 1639 m    | 1 min/10 min              |
| CH-FRU | Früebüel         | Montane Grassland | 47°06'57.0" N | 8°32'16.0" E | 982 m     | 30 min                    |
| CH-LAE | Lägeren          | Mixed Forest      | 47°28'42.0" N | 8°21'51.8" E | 682 m     | 30 min/10 min             |
| CH-OE2 | Oensingen        | Cropland          | 47°17'11.1" N | 7°44'01.5" E | 452 m     | 1 min                     |

<sup>a</sup> if two averaging intervals are given, then the first relates to all-wave radiation measurements and the second to temperature and other standard meteorological measurements during the 2015 eclipse

**Table S2.** MeteoSwiss standard weather stations used in this study with temperature drop  $\Delta T$  and timing  $t(\Delta T)$  (hour:minute CET). Measurement interval was 10 minutes.

| CODE | Station Name      | Elevation (m) | Longitude (E) | Latitude (N) | $\Delta T$ (K) | $t(\Delta T)$ |
|------|-------------------|---------------|---------------|--------------|----------------|---------------|
| ABO  | Adelboden         | 1326          | 7°33'37.5"    | 46°29'32.1"  | -1.56          | 09:50         |
| AIG  | Aigle             | 381           | 6°55'27.9"    | 46°19'35.9"  | -1.05          | 10:00         |
| ALT  | Altdorf           | 438           | 8°37'18.5"    | 46°53'13.3"  | -2.89          | 09:40         |
| AND  | Andeer            | 987           | 9°25'54.9"    | 46°36'36.4"  | -0.49          | 10:20         |
| ANT  | Andermatt         | 1438          | 8°34'50.0"    | 46°37'51.3"  | -1.32          | 09:30         |
| ARD  | Arosa             | 1840          | 9°40'28.3"    | 46°46'45.0"  | -3.82          | 09:40         |
| ARH  | Altenrhein        | 398           | 9°34'00.5"    | 47°29'01.2"  | -1.35          | 10:20         |
| ATT  | Les Attelas       | 2730          | 7°16'07.5"    | 46°05'56.8"  | -0.46          | 10:30         |
| BAS  | Basel / Binningen | 316           | 7°35'00.8"    | 47°32'27.7"  | -0.32          | 09:30         |
| BEH  | Passo del Bernina | 2260          | 10°01'10.5"   | 46°24'33.0"  | -0.98          | 10:20         |
| BER  | Bern / Zollikofen | 552           | 7°27'50.4"    | 46°59'26.7"  | -1.46          | 09:50         |
| BEZ  | Beznau            | 325           | 8°13'59.8"    | 47°33'26.0"  | -0.77          | 10:00         |
| BIE  | Bière             | 683           | 6°20'32.6"    | 46°31'29.5"  | -1.90          | 09:40         |

Table S2. (continued)

| CODE | Station Name             | Elevation (m) | Longitude (E) | Latitude (N) | $\Delta T$ (K) | $t(\Delta T)$ |
|------|--------------------------|---------------|---------------|--------------|----------------|---------------|
| BIN  | Binn                     | 1448          | 8°11'27.3"    | 46°21'55.7"  | -2.57          | 09:50         |
| BIZ  | Bischofszell             | 470           | 9°14'05.0"    | 47°29'50.6"  | -1.16          | 10:00         |
| BLA  | Blatten, Lötschental     | 1538          | 7°49'23.5"    | 46°25'13.6"  | -0.87          | 10:10         |
| BOL  | Boltigen                 | 820           | 7°23'03.1"    | 46°37'24.7"  | -1.11          | 09:50         |
| BOU  | Bouveret                 | 374           | 6°51'25.2"    | 46°23'36.4"  | -1.63          | 09:10         |
| BRL  | La Brévine               | 1050          | 6°36'37.0"    | 46°59'01.8"  | -2.71          | 09:20         |
| BUF  | Buffalora                | 1968          | 10°16'01.9"   | 46°38'53.3"  | -1.85          | 09:40         |
| BUS  | Buchs / Aarau            | 386           | 8°04'46.0"    | 47°23'03.6"  | -1.47          | 09:40         |
| CDF  | La Chaux-de-Fonds        | 1018          | 6°47'32.3"    | 47°04'58.6"  | -2.71          | 09:40         |
| CEV  | Cevio                    | 417           | 8°36'11.4"    | 46°19'13.8"  | -0.20          | 10:20         |
| CGI  | Nyon / Changins          | 455           | 6°13'39.9"    | 46°24'03.7"  | -1.41          | 09:20         |
| CHA  | Chasseral                | 1599          | 7°03'15.8"    | 47°07'54.4"  | -0.92          | 09:40         |
| CHB  | Les Charbonnières        | 1045          | 6°18'44.7"    | 46°40'12.5"  | -2.75          | 09:40         |
| CHD  | Château-d'Oex            | 1029          | 7°08'22.7"    | 46°28'47.3"  | -1.25          | 10:00         |
| CHM  | Chaumont                 | 1136          | 6°58'43.7"    | 47°02'57.0"  | -1.71          | 09:40         |
| CHU  | Chur                     | 556           | 9°31'50.1"    | 46°52'13.5"  | -1.40          | 10:00         |
| CHZ  | Cham                     | 442           | 8°27'52.7"    | 47°11'17.8"  | -0.59          | 10:00         |
| CIM  | Cimetta                  | 1661          | 8°47'29.9"    | 46°12'01.5"  | -1.09          | 09:30         |
| CMA  | Crap Masegn              | 2480          | 9°10'48.0"    | 46°50'32.3"  | -0.01          | 10:20         |
| COM  | Acquarossa / Comprovasco | 575           | 8°56'08.4"    | 46°27'33.9"  | -1.18          | 10:00         |
| COV  | Piz Corvatsch            | 3302          | 9°49'16.5"    | 46°25'04.8"  | -0.85          | 09:50         |
| COY  | Courtelary               | 695           | 7°05'26.3"    | 47°10'50.9"  | -1.72          | 10:00         |
| CRM  | Cressier                 | 431           | 7°03'32.8"    | 47°02'51.4"  | -0.54          | 09:40         |
| DAV  | Davos                    | 1594          | 9°50'36.6"    | 46°48'46.6"  | -2.30          | 09:40         |
| DEM  | Delémont                 | 439           | 7°20'58.4"    | 47°21'06.1"  | -1.48          | 10:40         |
| DIA  | Les Diablerets           | 2964          | 7°12'13.6"    | 46°19'36.3"  | -0.95          | 09:40         |
| DIS  | Disentis / Sedrun        | 1197          | 8°51'12.4"    | 46°42'23.5"  | -2.30          | 10:00         |
| DOL  | La Dôle                  | 1669          | 6°05'58.1"    | 46°25'28.9"  | -0.26          | 10:30         |
| EBK  | Ebnat-Kappel             | 623           | 9°06'30.5"    | 47°16'24.2"  | -0.87          | 10:10         |
| EGH  | Eggishorn                | 2893          | 8°05'33.8"    | 46°25'35.5"  | -2.19          | 09:30         |
| EGO  | Egolzwil                 | 521           | 8°00'17.1"    | 47°10'45.9"  | -1.27          | 09:50         |
| EIN  | Einsiedeln               | 910           | 8°45'23.6"    | 47°07'58.9"  | -0.92          | 10:20         |
| ELM  | Elm                      | 958           | 9°10'31.3"    | 46°55'25.5"  | -1.84          | 10:00         |
| ENG  | Engelberg                | 1035          | 8°24'37.6"    | 46°49'18.8"  | -3.08          | 09:50         |
| EVI  | Evionnaz                 | 482           | 7°01'36.3"    | 46°10'58.6"  | -0.10          | 09:50         |
| EVO  | Evolène / Villa          | 1825          | 7°30'31.2"    | 46°06'43.7"  | -2.93          | 10:00         |
| FAH  | Fahy                     | 596           | 6°56'27.9"    | 47°25'25.7"  | -2.28          | 10:00         |
| FLU  | Flühli, LU               | 939           | 8°01'13.2"    | 46°53'22.0"  | -1.24          | 10:00         |
| FRE  | Bullet / La Frétaz       | 1205          | 6°34'34.7"    | 46°50'26.2"  | -1.82          | 09:40         |
| GEN  | Monte Generoso           | 1600          | 9°01'04.3"    | 45°55'39.3"  | -0.85          | 09:40         |
| GES  | Gersau                   | 519           | 8°31'24.4"    | 46°59'45.8"  | -0.44          | 09:50         |
| GIH  | Giswil                   | 471           | 8°11'24.7"    | 46°50'58.2"  | -1.79          | 09:40         |
| GLA  | Glarus                   | 516           | 9°04'00.9"    | 47°02'04.5"  | -2.22          | 09:50         |
| GOA  | Göscheneralp             | 1745          | 8°29'59.9"    | 46°38'50.7"  | -2.12          | 09:30         |
| GOE  | Gösgen                   | 380           | 7°58'25.2"    | 47°21'46.9"  | -0.94          | 09:40         |
| GOR  | Gornergrat               | 3129          | 7°47'08.7"    | 45°59'01.1"  | -0.48          | 09:40         |
| GRA  | Fribourg / Posieux       | 646           | 7°06'49.3"    | 46°46'17.0"  | -0.96          | 09:50         |
| GRC  | Grächen                  | 1605          | 7°50'12.5"    | 46°11'43.1"  | -0.48          | 09:50         |
| GRE  | Grenchen                 | 430           | 7°24'54.4"    | 47°10'44.7"  | -1.37          | 09:50         |
| GRH  | Grimsel Hospiz           | 1980          | 8°19'59.7"    | 46°34'18.1"  | 0.03           | 09:50         |
| GRO  | Grono                    | 323           | 9°09'49.5"    | 46°15'18.3"  | -0.34          | 10:00         |
| GSB  | Col du Grand St-Bernard  | 2472          | 7°10'14.9"    | 45°52'07.6"  | -1.67          | 09:50         |
| GUE  | Gütsch ob Andermatt      | 2283          | 8°36'54.2"    | 46°39'08.8"  | -0.37          | 10:00         |
| GUT  | Güttingen                | 440           | 9°16'45.8"    | 47°36'06.1"  | -1.25          | 09:50         |
| GVE  | Genève-Cointrin          | 412           | 6°07'39.9"    | 46°14'51.0"  | -0.81          | 09:30         |
| HAI  | Salen-Reutenen           | 718           | 9°01'26.1"    | 47°39'04.4"  | -2.32          | 09:50         |
| HLL  | Hallau                   | 419           | 8°28'13.7"    | 47°41'50.2"  | -1.08          | 09:50         |

Table S2. (continued)

| CODE | Station Name            | Elevation (m) | Longitude (E) | Latitude (N) | $\Delta T$ (K) | $t(\Delta T)$ |
|------|-------------------------|---------------|---------------|--------------|----------------|---------------|
| HOE  | Hörnli                  | 1144          | 8°56'29.9"    | 47°22'15.1"  | -2.40          | 10:00         |
| ILZ  | Ilanz                   | 698           | 9°12'55.2"    | 46°46'30.1"  | -0.77          | 09:50         |
| INT  | Interlaken              | 577           | 7°52'12.5"    | 46°40'20.1"  | -2.29          | 09:50         |
| JUN  | Jungfrauoch             | 3580          | 7°59'07.2"    | 46°32'50.8"  | -0.68          | 10:00         |
| KLO  | Zürich / Kloten         | 426           | 8°32'09.9"    | 47°28'46.6"  | -1.49          | 09:50         |
| KOP  | Koppigen                | 484           | 7°36'19.7"    | 47°07'07.9"  | -2.20          | 09:40         |
| LAE  | Lägern                  | 845           | 8°23'50.0"    | 47°28'55.0"  | -0.21          | 10:10         |
| LAG  | Langnau i.E.            | 745           | 7°48'23.2"    | 46°56'22.7"  | -1.33          | 10:00         |
| LEI  | Leibstadt               | 341           | 8°11'17.7"    | 47°35'50.2"  | -1.03          | 09:50         |
| LUG  | Lugano                  | 273           | 8°57'37.1"    | 46°00'15.2"  | -0.14          | 09:40         |
| LUZ  | Luzern                  | 454           | 8°18'03.5"    | 47°02'11.2"  | -0.34          | 10:20         |
| MAG  | Magadino / Cadenazzo    | 203           | 8°56'01.2"    | 46°09'36.1"  | -0.48          | 10:10         |
| MAH  | Mathod                  | 437           | 6°34'04.7"    | 46°44'13.1"  | -2.30          | 09:50         |
| MAS  | Marsens                 | 714           | 7°04'10.8"    | 46°39'23.3"  | -1.48          | 09:40         |
| MER  | Meiringen               | 588           | 8°10'09.3"    | 46°43'56.0"  | -1.08          | 09:40         |
| MLS  | Le Moléson              | 1974          | 7°01'04.1"    | 46°32'46.2"  | -1.09          | 09:30         |
| MOA  | Mosen                   | 453           | 8°13'58.1"    | 47°14'37.8"  | -0.72          | 09:50         |
| MOE  | Möhlín                  | 344           | 7°52'40.5"    | 47°34'19.9"  | -1.23          | 10:00         |
| MRP  | Monte Rosa-Plattje      | 2885          | 7°48'52.5"    | 45°57'23.9"  | -1.61          | 10:10         |
| MTR  | Matro                   | 2171          | 8°55'29.1"    | 46°24'36.4"  | -0.03          | 09:50         |
| MUB  | Mühleberg               | 479           | 7°16'41.3"    | 46°58'23.7"  | -0.60          | 09:40         |
| MVE  | Montana                 | 1427          | 7°27'38.8"    | 46°17'55.5"  | -1.58          | 10:00         |
| NAP  | Napf                    | 1403          | 7°56'24.2"    | 47°00'16.8"  | -0.58          | 08:50         |
| NAS  | Naluns / Schlivera      | 2400          | 10°15'41.0"   | 46°49'01.8"  | -0.09          | 08:50         |
| NEU  | Neuchâtel               | 485           | 6°57'14.8"    | 47°00'01.6"  | -1.75          | 10:20         |
| ORO  | Oron                    | 827           | 6°51'29.6"    | 46°34'20.1"  | -1.82          | 09:50         |
| OTL  | Locarno / Monti         | 366           | 8°47'14.7"    | 46°10'21.2"  | -0.22          | 09:40         |
| PAY  | Payerne                 | 490           | 6°56'32.7"    | 46°48'41.7"  | -2.19          | 10:10         |
| PIL  | Pilatus                 | 2106          | 8°15'08.4"    | 46°58'43.9"  | -2.68          | 09:40         |
| PIO  | Piotta                  | 990           | 8°41'17.3"    | 46°30'53.2"  | -0.91          | 10:30         |
| PLF  | Plaffeien               | 1042          | 7°15'57.6"    | 46°44'51.6"  | -2.21          | 09:50         |
| PMA  | Piz Martegnas           | 2670          | 9°31'46.4"    | 46°34'37.9"  | -1.97          | 09:00         |
| PSI  | PSI Würenlingen         | 334           | 8°13'45.9"    | 47°32'18.4"  | -1.87          | 10:00         |
| PUY  | Pully                   | 455           | 6°40'02.7"    | 46°30'44.3"  | -0.44          | 09:40         |
| RAG  | Bad Ragaz               | 496           | 9°30'09.3"    | 47°00'59.9"  | -0.55          | 09:50         |
| REH  | Zürich / Affoltern      | 443           | 8°31'04.4"    | 47°25'39.6"  | -0.08          | 10:40         |
| ROB  | Poschiavo / Robbia      | 1078          | 10°3'40.2"    | 46°20'47.9"  | -0.70          | 10:40         |
| ROE  | Robièi                  | 1896          | 8°30'48.2"    | 46°26'35.0"  | -2.13          | 09:30         |
| ROG  | Rossberg                | 1119          | 8°32'51.4"    | 47°04'24.8"  | 0.23           | 09:50         |
| RUE  | Rünenberg               | 611           | 7°52'45.6"    | 47°26'04.4"  | -1.67          | 09:40         |
| SAE  | Säntis                  | 2502          | 9°20'37.1"    | 47°14'58.0"  | -0.94          | 09:50         |
| SAG  | Sattel-Aegeri           | 790           | 8°38'13.1"    | 47°04'51.8"  | -2.34          | 09:50         |
| SAM  | Samedan                 | 1708          | 9°52'44.3"    | 46°31'35.0"  | -1.02          | 09:50         |
| SBE  | S. Bernardino           | 1638          | 9°11'04.8"    | 46°27'48.8"  | -1.23          | 09:50         |
| SBO  | Stabio                  | 353           | 8°55'56.5"    | 45°50'36.2"  | -1.74          | 09:40         |
| SCU  | Scuol                   | 1303          | 10°16'59.6"   | 46°47'35.8"  | -2.18          | 09:40         |
| SHA  | Schaffhausen            | 438           | 8°37'12.3"    | 47°41'23.2"  | -0.62          | 09:50         |
| SIA  | Segl-Maria              | 1804          | 9°45'44.4"    | 46°25'56.4"  | -1.93          | 09:30         |
| SIO  | Sion                    | 482           | 7°19'48.6"    | 46°13'06.9"  | -1.57          | 09:40         |
| SMA  | Zürich / Fluntern       | 555           | 8°33'56.7"    | 47°22'40.4"  | -0.07          | 10:10         |
| SMM  | Sta. Maria, Val Müstair | 1383          | 10°25'34.7"   | 46°36'08.1"  | -1.61          | 10:00         |
| SPF  | Schüpfheim              | 742           | 8°00'44.8"    | 46°56'49.3"  | -1.72          | 09:50         |
| SRS  | Schiers                 | 626           | 9°40'05.0"    | 46°58'31.8"  | -2.00          | 09:50         |
| STG  | St. Gallen              | 775           | 9°23'54.5"    | 47°25'31.6"  | -1.49          | 10:10         |
| STP  | Stöckalp                | 1070          | 8°16'52.3"    | 46°48'00.0"  | -1.62          | 10:00         |
| TAE  | Aadorf / Tänikon        | 539           | 8°54'17.6"    | 47°28'47.5"  | -0.61          | 10:00         |
| THU  | Thun                    | 570           | 7°35'06.8"    | 46°44'59.5"  | -0.42          | 09:50         |
| TIT  | Titlis                  | 3040          | 8°25'32.9"    | 46°46'13.8"  | -1.57          | 10:20         |

Table S2. (continued)

| CODE   | Station Name           | Elevation (m) | Longitude (E) | Latitude (N) | $\Delta T$ (K) | $t(\Delta T)$ |
|--------|------------------------|---------------|---------------|--------------|----------------|---------------|
| TSG    | Arosa / Tschuggen      | 1840          | 9°39'58.8"    | 46°46'51.4"  | -5.44          | 09:40         |
| ULR    | Ulrichen               | 1345          | 8°18'29.3"    | 46°30'17.4"  | 0.25           | 08:40         |
| VAB    | Valbella               | 1569          | 9°33'15.9"    | 46°45'18.1"  | -0.77          | 10:00         |
| VAD    | Vaduz                  | 457           | 9°31'03.0"    | 47°07'38.8"  | 0.15           | 09:50         |
| VIO    | Vicosoprano            | 1089          | 9°37'40.1"    | 46°21'10.9"  | -1.68          | 10:10         |
| VIS    | Visp                   | 639           | 7°50'34.6"    | 46°18'10.3"  | -0.76          | 09:50         |
| VIT    | Villars-Tiercelin      | 859           | 6°42'36.3"    | 46°37'18.4"  | -1.46          | 09:50         |
| VSBLI  | Blinnen                | 1530          | 8°15'35.3"    | 46°27'25.2"  | 0.01           | 10:10         |
| VSBRU  | Bruchji                | 2300          | 7°58'19.9"    | 46°22'43.0"  | -3.60          | 09:10         |
| VSBS   | Bourg-St-Pierre        | 1826          | 7°11'53.6"    | 45°55'39.3"  | -3.09          | 10:10         |
| VSCHO  | Choëx                  | 896           | 6°57'40.9"    | 46°13'55.7"  | -2.09          | 09:40         |
| VSCOL  | Les Collons            | 1787          | 7°23'14.5"    | 46°10'44.3"  | -0.51          | 09:50         |
| VSDER  | Derborence             | 1380          | 7°13'57.0"    | 46°17'18.6"  | -4.14          | 09:40         |
| VSDUR  | Durnand                | 2000          | 7°05'02.7"    | 46°03'06.4"  | -2.38          | 09:50         |
| VSERG  | Ergisch                | 1133          | 7°42'58.7"    | 46°17'34.8"  | -1.51          | 09:40         |
| VSISE  | Isérables              | 1237          | 7°14'55.5"    | 46°09'39.3"  | -1.00          | 08:40         |
| VSREN  | Nendaz                 | 1938          | 7°18'41.1"    | 46°07'19.5"  | -3.19          | 09:40         |
| VSSIE  | Sierre                 | 535           | 7°33'23.0"    | 46°17'55.6"  | -3.56          | 09:50         |
| VSSOR  | Sorniot-Lac Inférieur  | 2005          | 7°06'00.2"    | 46°10'01.0"  | -5.78          | 09:50         |
| VSTRI  | Trient                 | 1290          | 6°59'41.6"    | 46°3'30.2"   | -1.97          | 09:30         |
| VSTSN  | Tsanfleuron            | 2052          | 7°18'06.5"    | 46°19'14.5"  | -5.43          | 10:00         |
| VSVIS  | Visperterminen         | 1360          | 7°54'15.1"    | 46°15'46.4"  | -0.71          | 09:50         |
| WAE    | Wädenswil              | 485           | 8°40'39.8"    | 47°13'14.3"  | -1.55          | 10:20         |
| WFJ    | Weissfluhjoch          | 2691          | 9°48'23.0"    | 46°49'60.0"  | -1.22          | 10:00         |
| WSLALB | Alptal Bestand         | 1168          | 8°42'47.6"    | 47°02'55.8"  | -1.33          | 10:10         |
| WSLBAB | Beatenberg Bestand     | 1522          | 7°45'48.6"    | 46°42'00.4"  | -1.65          | 10:10         |
| WSLBAF | Beatenberg Freiland    | 1560          | 7°46'18.2"    | 46°42'02.1"  | -1.94          | 09:50         |
| WSLBTB | Bettlachstock Bestand  | 1050          | 7°24'38.1"    | 47°13'20.2"  | -3.10          | 10:00         |
| WSLBTF | Bettlachstock Freiland | 1100          | 7°25'02.8"    | 47°13'28.2"  | -4.71          | 10:00         |
| WSLCIB | Chironico Bestand      | 1460          | 8°49'06.1"    | 46°26'28.3"  | -0.40          | 10:10         |
| WSLCIF | Chironico Freiland     | 1380          | 8°48'46.9"    | 46°26'47.0"  | -1.81          | 09:50         |
| WSLCLB | Celerina Bestand       | 1760          | 9°52'33.1"    | 46°30'21.9"  | -1.67          | 10:00         |
| WSLCLF | Celerina Freiland      | 1865          | 9°53'18.2"    | 46°29'33.1"  | -3.70          | 09:50         |
| WSLISB | Isonne Bestand         | 1194          | 9°00'28.8"    | 46°07'30.4"  | -0.57          | 10:30         |
| WSLISF | Isonne Freiland        | 1149          | 9°00'25.1"    | 46°07'34.4"  | -1.10          | 10:30         |
| WSLJUB | Jussy Bestand          | 500           | 6°17'35.3"    | 46°13'52.7"  | -2.33          | 10:00         |
| WSLJUF | Jussy Freiland         | 497           | 6°17'12.6"    | 46°13'43.1"  | -4.09          | 09:50         |
| WSLLAB | Lausanne Bestand       | 806           | 6°39'29.1"    | 46°35'01.4"  | -1.66          | 10:00         |
| WSLLAF | Lausanne Freiland      | 790           | 6°38'56.4"    | 46°33'33.4"  | -3.44          | 09:50         |
| WSLLEB | Lens Bestand           | 1069          | 7°26'09.1"    | 46°16'06.9"  | -0.82          | 10:10         |
| WSLNAB | Nationalpark Bestand   | 1913          | 10°14'28.0"   | 46°39'33.1"  | -2.21          | 10:00         |
| WSLNAF | Nationalpark Freiland  | 1899          | 10°13'47.8"   | 46°39'44.5"  | -1.55          | 10:00         |
| WSLNEB | Neunkirch Bestand      | 561           | 8°32'05.1"    | 47°41'02.3"  | -0.96          | 10:20         |
| WSLNEF | Neunkirch Freiland     | 463           | 8°31'34.8"    | 47°41'23.3"  | -3.57          | 10:00         |
| WSLNOB | Novaggio Bestand       | 928           | 8°50'04.0"    | 46°01'19.5"  | -0.99          | 09:40         |
| WSLNOF | Novaggio Freiland      | 1055          | 8°50'04.7"    | 46°1'28.8"   | -0.97          | 09:30         |
| WSLOTB | Othmarsingen Bestand   | 474           | 8°13'37.3"    | 47°23'55.2"  | -2.79          | 10:00         |
| WSLOTF | Othmarsingen Freiland  | 461           | 8°13'23.1"    | 47°24'00.8"  | -3.41          | 10:00         |
| WSLSCB | Schänis Bestand        | 709           | 9°04'00.3"    | 47°09'56.3"  | -0.52          | 10:20         |
| WSLSCF | Schänis Freiland       | 626           | 9°03'34.4"    | 47°09'04.4"  | -2.15          | 10:10         |
| WSLVOB | Vordemwald Bestand     | 482           | 7°53'13.4"    | 47°16'26.0"  | -0.93          | 10:10         |
| WSLVOF | Vordemwald Freiland    | 480           | 7°54'39.8"    | 47°16'08.4"  | -2.02          | 09:50         |
| WSLVSB | Visp Bestand           | 698           | 7°51'26.3"    | 46°17'48.9"  | -2.46          | 10:00         |
| WSLVSF | Visp Freiland          | 640           | 7°50'33.4"    | 46°18'09.7"  | -1.43          | 09:50         |
| WYN    | Wynau                  | 422           | 7°47'14.7"    | 47°15'18.1"  | -1.07          | 09:50         |
| ZER    | Zermatt                | 1638          | 7°45'11.2"    | 46°01'44.9"  | -2.55          | 09:10         |

**Table S3.** MeteoSwiss standard weather stations measured wind speed and wind direction and their classification according to topography. Where possible, the orientation of the valley and the slope angle are given.

| Code | Location                 | Longitude     | Latitude      | Elevation (m) | Classification | Up-Valley Dir. | Slope Angle |
|------|--------------------------|---------------|---------------|---------------|----------------|----------------|-------------|
| ABO  | Adelboden                | 7°33'37.5" E  | 46°29'32.1" N | 1326          | valley         | 225°           | 310°        |
| AEG  | Oberägeri                | 8°36'29.1" E  | 47°08'00.9" N | 724           | flat           | 315°           | 45°         |
| AIG  | Aigle                    | 6°55'27.9" E  | 46°19'35.9" N | 381           | valley         | 315°           |             |
| ALP  | Alpnach                  | 8°17'08.6" E  | 46°56'34.8" N | 436           | valley         | 200°           |             |
| ALT  | Altdorf                  | 8°37'18.5" E  | 46°53'13.3" N | 438           | valley         | 150°           |             |
| AND  | Andeer                   | 9°25'54.9" E  | 46°36'36.4" N | 987           | valley         | 200°           | 110°        |
| ANT  | Andermatt                | 8°34'50.0" E  | 46°37'51.3" N | 1438          | valley         | 225°           |             |
| ARD  | Arosa                    | 9°40'28.3" E  | 46°46'45.0" N | 1840          | slope          | 255°           | 310°        |
| ARH  | Altenrhein               | 9°34'00.5" E  | 47°29'01.2" N | 398           | flat           | 120°           | 190°        |
| ATT  | Les Attelas              | 7°16'07.5" E  | 46°05'56.8" N | 2730          | mtohill        | 160°           |             |
| BAN  | Bantiger                 | 7°31'43.2" E  | 46°58'40.1" N | 941           | mtohill        | 135°           |             |
| BAS  | Basel / Binningen        | 7°35'00.8" E  | 47°32'27.7" N | 316           | slope          | 110°           | 190°        |
| BEH  | Passo del Bernina        | 10°01'10.5" E | 46°24'33.0" N | 2260          | slope          | 135°           | 45°         |
| BER  | Bern / Zollikofen        | 7°27'50.4" E  | 46°59'26.7" N | 552           | flat           | 0°             |             |
| BEZ  | Bezau                    | 8°13'59.8" E  | 47°33'26.0" N | 325           | valley         | 255°           |             |
| BHF  | Oberrüti / Büelhof       | 7°16'58.7" E  | 46°57'07.6" N | 775           | mtohill        | 310°           |             |
| BIE  | Bière                    | 6°20'32.6" E  | 46°31'29.5" N | 683           | flat           | 225°           | 315°        |
| BIN  | Binn                     | 8°11'27.3" E  | 46°21'55.7" N | 1448          | valley         | 75°            | 170°        |
| BIZ  | Bischofszell             | 9°14'05.0" E  | 47°29'50.6" N | 470           | flat           | 60°            |             |
| BLA  | Blatten, Lötschental     | 7°49'23.5" E  | 46°25'13.6" N | 1538          | valley         | 50°            | 100°        |
| BOL  | Boltigen                 | 7°23'03.1" E  | 46°37'24.7" N | 820           | valley         | 200°           |             |
| BOU  | Bouveret                 | 6°51'25.2" E  | 46°23'36.4" N | 374           | flat           | 135°           |             |
| BRL  | La Brévine               | 6°36'37.0" E  | 46°59'01.8" N | 1050          | valley         | 270°           |             |
| BRZ  | Brienz                   | 8°03'39.1" E  | 46°44'26.6" N | 567           | valley         | 85°            |             |
| BUF  | Buffalora                | 10°16'01.9" E | 46°38'53.3" N | 1968          | slope          | 170°           | 45°         |
| BUS  | Buchs / Aarau            | 8°04'46.0" E  | 47°23'03.6" N | 386           | flat           | 170°           |             |
| CDF  | La Chaux-de-Fonds        | 6°47'32.3" E  | 47°04'58.6" N | 1018          | valley         | 45°            | 315°        |
| CEV  | Cevio                    | 8°36'11.4" E  | 46°19'13.8" N | 417           | valley         | 0°             |             |
| CGI  | Nyon / Changins          | 6°13'39.9" E  | 46°24'03.7" N | 455           | mtohill        | 30°            |             |
| CHA  | Chasseral                | 7°03'15.8" E  | 47°07'54.4" N | 1599          | mtohill        | 240°           |             |
| CHB  | Les Charbonnières        | 6°18'44.7" E  | 46°40'12.5" N | 1045          | slope          | 225°           | 315°        |
| CHD  | Château-d'Oex            | 7°08'22.7" E  | 46°28'47.3" N | 1029          | slope          | 100°           | 0°          |
| CHM  | Chaumont                 | 6°58'43.7" E  | 47°02'57.0" N | 1136          | mtohill        | 200°           |             |
| CHU  | Chur                     | 9°31'50.1" E  | 46°52'13.5" N | 556           | valley         | 200°           |             |
| CHZ  | Cham                     | 8°27'52.7" E  | 47°11'17.8" N | 442           | mtohill        | 170°           |             |
| CIM  | Cimetta                  | 8°47'29.9" E  | 46°12'01.5" N | 1661          | mtohill        | 345°           |             |
| CMA  | Crap Masegn              | 9°10'48.0" E  | 46°50'32.3" N | 2480          | mtohill        | 320°           |             |
| COM  | Acquarossa / Comprovasco | 8°56'08.4" E  | 46°27'33.9" N | 575           | valley         | 350°           | 270°        |
| COV  | Piz Corvatsch            | 9°49'16.5" E  | 46°25'04.8" N | 3302          | mtohill        | 45°            |             |
| COY  | Courtelary               | 7°05'26.3" E  | 47°10'50.9" N | 695           | slope          | 250°           | 170°        |
| CRM  | Cressier                 | 7°03'32.8" E  | 47°02'51.4" N | 431           | flat           | 250°           |             |
| DAV  | Davos                    | 9°50'36.6" E  | 46°48'46.6" N | 1594          | slope          | 220°           | 310°        |
| DEM  | Delémont                 | 7°20'58.4" E  | 47°21'06.1" N | 439           | slope          |                | 160°        |
| DIA  | Les Diablerets           | 7°12'13.6" E  | 46°19'36.3" N | 2964          | mtohill        | 325°           |             |
| DIS  | Disentis / Sedrun        | 8°51'12.4" E  | 46°42'23.5" N | 1197          | slope          | 225°           | 315°        |
| DOL  | La Dôle                  | 6°05'58.1" E  | 46°25'28.9" N | 1669          | mtohill        | 225°           |             |
| EBK  | Ebnat-Kappel             | 9°06'30.5" E  | 47°16'24.2" N | 623           | valley         | 140°           |             |
| EGH  | Eggishorn                | 8°05'33.8" E  | 46°25'35.5" N | 2893          | mtohill        | 20°            |             |
| EGO  | Egolzwil                 | 8°00'17.1" E  | 47°10'45.9" N | 521           | mtohill        | 20°            |             |
| EIN  | Einsiedeln               | 8°45'23.6" E  | 47°07'58.9" N | 910           | slope          | 170°           | 313°        |
| ELM  | Elm                      | 9°10'31.3" E  | 46°55'25.5" N | 958           | slope          | 190°           | 120°        |
| EMM  | Emmen                    | 8°17'45.5" E  | 47°05'03.5" N | 426           | flat           | 225°           |             |
| ENG  | Engelberg                | 8°24'37.6" E  | 46°49'18.8" N | 1035          | slope          | 30°            | 120°        |
| EVI  | Evionnaz                 | 7°01'36.3" E  | 46°10'58.6" N | 482           | slope          | 280            | 0°          |
| EVO  | Evolène / Villa          | 7°30'31.2" E  | 46°06'43.7" N | 1825          | slope          | 40°            | 130°        |

Table S3. (continued)

| Code | Location                | Longitude     | Latitude      | Elevation (m) | Classification | Valley Dir. | Slope Angle |
|------|-------------------------|---------------|---------------|---------------|----------------|-------------|-------------|
| FAH  | Fahy                    | 6°56'27.9" E  | 47°25'25.7" N | 596           | mtohill        | 260°        | 170°        |
| FRE  | Bullet / La Frétaz      | 6°34'34.7" E  | 46°50'26.2" N | 1205          | mtohill        | 225°        | 315°        |
| GEN  | Monte Generoso          | 9°01'04.3" E  | 45°55'39.3" N | 1600          | mtohill        | 45°         |             |
| GES  | Gersau                  | 8°31'24.4" E  | 46°59'45.8" N | 519           | slope          | 60°         | 330°        |
| GIH  | Giswil                  | 8°11'24.7" E  | 46°50'58.2" N | 471           | flat           | 200°        |             |
| GLA  | Glarus                  | 9°04'00.9" E  | 47°02'04.5" N | 516           | slope          | 135°        | 200°        |
| GOE  | Gösgen                  | 7°58'25.2" E  | 47°21'46.9" N | 380           | flat           | 290°        |             |
| GOR  | Gornergrat              | 7°47'08.7" E  | 45°59'01.1" N | 3129          | mtohill        | 270°        |             |
| GRA  | Fribourg / Posieux      | 7°06'49.3" E  | 46°46'17.0" N | 646           | slope          | 225°        | 315°        |
| GRE  | Grenchen                | 7°24'54.4" E  | 47°10'44.7" N | 430           | flat           | 245°        |             |
| GRH  | Grimsel Hospiz          | 8°19'59.7" E  | 46°34'18.1" N | 1980          | mtohill        | 225°        |             |
| GRO  | Grono                   | 9°09'49.5" E  | 46°15'18.3" N | 323           | valley         | 30°         |             |
| GSB  | Col du Grand St-Bernard | 7°10'14.9" E  | 45°52'07.6" N | 2472          | valley         | 270°        | 0°          |
| GUB  | Regensdorf / Gubrist    | 8°28'44.1" E  | 47°29'59.5" N | 410           | mtohill        | 270°        |             |
| GUE  | Gütsch ob Andermatt     | 8°36'54.2" E  | 46°39'08.8" N | 2283          | mtohill        | 250°        | 0°          |
| GUT  | Güttingen               | 9°16'45.8" E  | 47°36'06.1" N | 440           | slope          | 11°0        | 200°        |
| GVE  | Genève-Cointrin         | 6°07'39.9" E  | 46°14'51.0" N | 412           | flat           | 45°         |             |
| HAI  | Salen-Reutenen          | 9°01'26.1" E  | 47°39'04.4" N | 718           | flat           | 270°        |             |
| HLL  | Hallau                  | 8°28'13.7" E  | 47°41'50.2" N | 419           | valley         | 40°         | 310°        |
| HOE  | Hörnli                  | 8°56'29.9" E  | 47°22'15.1" N | 1144          | mtohill        | 350°        |             |
| INT  | Interlaken              | 7°52'12.5" E  | 46°40'20.1" N | 577           | valley         | 180°        |             |
| JUN  | Jungfrauoch             | 7°59'07.2" E  | 46°32'50.8" N | 3580          | mtohill        | 40°         |             |
| KLO  | Zürich / Kloten         | 8°32'09.9" E  | 47°28'46.6" N | 426           | flat           | 135°        |             |
| KOP  | Koppigen                | 7°36'19.7" E  | 47°07'07.9" N | 484           | flat           | 135°        |             |
| LAE  | Lägern                  | 8°23'50.0" E  | 47°28'55.0" N | 845           | mtohill        | 270°        |             |
| LAG  | Langnau i.E.            | 7°48'23.2" E  | 46°56'22.7" N | 745           | slope          | 110°        | 20°         |
| LCK  | Lucketen                | 7°31'43.2" E  | 46°58'40.1" N | 941           | slope          |             | 330°        |
| LEI  | Leibstadt               | 8°11'17.7" E  | 47°35'50.2" N | 341           | flat           | 250°        |             |
| LUG  | Lugano                  | 8°57'37.1" E  | 46°00'15.2" N | 273           | flat           | 30°         |             |
| LUZ  | Luzern                  | 8°18'03.5" E  | 47°02'11.2" N | 454           | flat           | 180°        |             |
| MAG  | Magadino / Cadenazzo    | 8°56'01.2" E  | 46°09'36.1" N | 203           | flat           | 80°         |             |
| MAH  | Mathod                  | 6°34'04.7" E  | 46°44'13.1" N | 437           | flat           | 225°        |             |
| MAS  | Marsens                 | 7°04'10.8" E  | 46°39'23.3" N | 714           | flat           | 200°        | 290°        |
| MER  | Meiringen               | 8°10'09.3" E  | 46°43'56.0" N | 588           | flat           | 135°        |             |
| MLS  | Le Moléson              | 7°01'04.1" E  | 46°32'46.2" N | 1974          | mtohill        | 0°          |             |
| MOA  | Mosen                   | 8°13'58.1" E  | 47°14'37.8" N | 453           | flat           | 135°        |             |
| MOE  | Möhlin                  | 7°52'40.5" E  | 47°34'19.9" N | 344           | flat           | 110°        |             |
| MRP  | Monte Rosa-Plattje      | 7°48'52.5" E  | 45°57'23.9" N | 2885          | slope          |             | 135°        |
| MSK  | Mühleberg / Stockeren   | 8°38'57.1" E  | 47°28'01.9" N | 592           | mtohill        | 270°        |             |
| MTR  | Matro                   | 8°55'29.1" E  | 46°24'36.4" N | 2171          | mtohill        | 310°        |             |
| MUB  | Mühleberg               | 7°16'41.3" E  | 46°58'23.7" N | 479           | valley         | 90°         | 180°        |
| MVE  | Montana                 | 7°27'38.8" E  | 46°17'55.5" N | 1427          | slope          |             | 80°         |
| NAP  | Napf                    | 7°56'24.2" E  | 47°00'16.8" N | 1403          | mtohill        | 270°        |             |
| NAS  | Naluns / Schlivera      | 10°15'41.0" E | 46°49'01.8" N | 2400          | mtohill        | 315°        |             |
| NEE  | Neerach                 | 8°38'57.1" E  | 47°28'01.9" N | 592           | flat           | 200°        | 290°        |
| NEU  | Neuchâtel               | 6°57'14.8" E  | 47°00'01.6" N | 485           | mtohill        | 45°         |             |
| ORO  | Oron                    | 6°51'29.6" E  | 46°34'20.1" N | 827           | flat           | 225°        |             |
| OTL  | Locarno / Monti         | 8°47'14.7" E  | 46°10'21.2" N | 366           | slope          |             | 320°        |
| PAY  | Payerne                 | 6°56'32.7" E  | 46°48'41.7" N | 490           | slope          | 220°        | 310°        |
| PIL  | Pilatus                 | 8°15'08.4" E  | 46°58'43.9" N | 2106          | mtohill        | 225°        |             |
| PIO  | Piotta                  | 8°41'17.3" E  | 46°30'53.2" N | 990           | valley         | 270°        | 0°          |
| PLF  | Plaffeien               | 7°15'57.6" E  | 46°44'51.6" N | 1042          | mtohill        | 225°        |             |
| PMA  | Piz Martegnas           | 9°31'46.4" E  | 46°34'37.9" N | 2670          | mtohill        | 225°        |             |
| PRE  | St-Prex                 | 6°26'34.8" E  | 46°29'01.2" N | 425           | mtohill        | 180°        |             |
| PSI  | PSI Würenlingen         | 7°16'58.7" E  | 46°57'07.6" N | 775           | valley         | 225°        | 135°        |
| PUY  | Pully                   | 6°40'02.7" E  | 46°30'44.3" N | 455           | slope          | 130°        | 40°         |
| QUI  | Quinten                 | 9°12'57.8" E  | 47°07'43.5" N | 419           | flat           | 260°        | 350°        |
| RAG  | Bad Ragaz               | 9°30'09.3" E  | 47°00'59.8" N | 496           | valley         | 150°        |             |

**Table S3.** (continued)

| Code   | Location                | Longitude      | Latitude       | Elevation (m) | Classification | Valley Dir. | Slope Angle |
|--------|-------------------------|----------------|----------------|---------------|----------------|-------------|-------------|
| REH    | Zürich / Affoltern      | 8°31'04.4'' E  | 47°25'39.6'' N | 443           | flat           | 90°         |             |
| ROB    | Poschiavo / Robbia      | 10°03'40.2'' E | 46°20'47.9'' N | 1078          | slope          | 200°        |             |
| ROE    | Robièi                  | 8°30'48.2'' E  | 46°26'35.0'' N | 1896          | slope          |             | 315°        |
| RUE    | Rünenberg               | 7°52'45.6'' E  | 47°26'04.4'' N | 611           | mtohill        | 270°        |             |
| SAE    | Säntis                  | 9°20'37.1'' E  | 47°14'58.0'' N | 2502          | mtohill        | 330°        |             |
| SAG    | Sattel-Aegeri           | 8°38'13.1'' E  | 47°04'51.8'' N | 790           | valley         | 45°         |             |
| SAM    | Samedan                 | 9°52'44.3'' E  | 46°31'35.0'' N | 1708          | flat           | 220°        |             |
| SBE    | S. Bernardino           | 9°11'04.8'' E  | 46°27'48.8'' N | 1638          | slope          | 270°        | 0°          |
| SBO    | Stabio                  | 8°55'56.5'' E  | 45°50'36.2'' N | 353           | valley         | 250°        |             |
| SCM    | Schmerikon              | 8°56'24.9'' E  | 47°13'28.6'' N | 408           | flat           | 90°         | 0°          |
| SCU    | Scuol                   | 10°16'59.6'' E | 46°47'35.8'' N | 1303          | slope          | 330°        | 240°        |
| SHA    | Schaffhausen            | 8°37'12.3'' E  | 47°41'23.2'' N | 438           | valley         | 170°        | 280°        |
| SIA    | Segl-Maria              | 9°45'44.3'' E  | 46°25'56.4'' N | 1804          | flat           | 240°        |             |
| SIO    | Sion                    | 7°19'48.6'' E  | 46°13'06.9'' N | 482           | flat           | 250°        |             |
| SIR    | Sion                    | 7°20'19.9'' E  | 46°13'18.7'' N | 483           | flat           | 250°        |             |
| SLB    | Stadlerberg             | 8°33'24.7'' E  | 47°28'59.5'' N | 496           | mtohill        | 170°        | 260°        |
| SMA    | Zürich / Fluntern       | 8°33'56.7'' E  | 47°22'40.4'' N | 555           | slope          | 135°        | 45°         |
| SMM    | Sta. Maria, Val Müstair | 10°25'34.7'' E | 46°36'08.1'' N | 1383          | slope          | 225°        | 135°        |
| SPF    | Schüpfheim              | 8°00'44.8'' E  | 46°56'49.3'' N | 742           | slope          | 200°        | 110°        |
| SRS    | Schiers                 | 9°40'05.0'' E  | 46°58'31.8'' N | 626           | valley         | 110°        | 20°         |
| STC    | St. Chrischona          | 8°28'44.1'' E  | 47°29'59.5'' N | 410           | slope          | 270°        | 180°        |
| STG    | St. Gallen              | 9°23'54.5'' E  | 47°25'31.6'' N | 775           | slope          |             | 135°        |
| STK    | Steckborn               | 8°58'53.2'' E  | 47°40'07.1'' N | 398           | flat           | 45°         | 135°        |
| TAE    | Aadorf / Tänikon        | 8°54'17.6'' E  | 47°28'47.5'' N | 539           | valley         | 115°        |             |
| THU    | Thun                    | 7°35'06.8'' E  | 46°44'59.5'' N | 570           | flat           | 150°        |             |
| TIT    | Titlis                  | 8°25'32.9'' E  | 46°46'13.8'' N | 3040          | mtohill        | 270°        | 135°        |
| TSG    | Arosa / Tschuggen       | 9°39'58.8'' E  | 46°46'51.4'' N | 1840          | mtohill        | 270°        | 0°          |
| UEB    | Uetliberg               | 8°33'24.7'' E  | 47°28'59.5'' N | 496           | mtohill        | 0°          |             |
| ULR    | Ulrichen                | 8°18'29.3'' E  | 46°30'17.4'' N | 1345          | valley         | 40°         | 130°        |
| VAB    | Valbella                | 9°33'15.9'' E  | 46°45'18.1'' N | 1569          | slope          |             | 225°        |
| VAD    | Vaduz                   | 9°31'03.0'' E  | 47°07'38.8'' N | 457           | flat           | 80°         |             |
| VIO    | Vicosoprano             | 9°37'40.1'' E  | 46°21'10.9'' N | 1089          | valley         | 250°        |             |
| VIS    | Visp                    | 7°50'34.6'' E  | 46°18'10.3'' N | 639           | flat           | 100°        |             |
| VIT    | Villars-Tiercelin       | 6°42'36.3'' E  | 46°37'18.4'' N | 859           | slope          | 210°        | 300°        |
| WAE    | Wädenswil               | 8°40'39.8'' E  | 47°13'14.3'' N | 485           | slope          | 120°        | 210°        |
| WFJ    | Weissfluhjoch           | 9°48'23.0'' E  | 46°49'60.0'' N | 2691          | mtohill        | 230°        |             |
| WSLBAF | Beatenberg Freiland     | 7°46'18.2'' E  | 46°42'02.1'' N | 1560          | slope          |             | 0°          |
| WSLBTF | Bettlachstock Freiland  | 7°25'02.8'' E  | 47°13'28.2'' N | 1100          | slope          | 225°        | 315°        |
| WSLCIF | Chironico Freiland      | 8°48'46.9'' E  | 46°26'47.0'' N | 1380          | slope          | 270°        | 180°        |
| WSLCLF | Celerina Freiland       | 9°53'18.2'' E  | 46°29'33.1'' N | 1865          | slope          | 135°        | 225°        |
| WSLISF | Isonne Freiland         | 9°00'25.1'' E  | 46°07'34.4'' N | 1149          | slope          | 120°        | 210°        |
| WSLJUF | Jussy Freiland          | 6°17'12.6'' E  | 46°13'43.1'' N | 497           | slope          | 225°        | 135°        |
| WSLLAF | Lausanne Freiland       | 6°38'56.4'' E  | 46°33'33.4'' N | 790           | mtohill        | 40°         |             |
| WSLNAF | Nationalpark Freiland   | 10°13'47.8'' E | 46°39'44.5'' N | 1899          | slope          | 110°        | 315°        |
| WSLNEF | Neunkrich Freiland      | 8°31'34.8'' E  | 47°41'23.3'' N | 463           | mtohill        | 60°         |             |
| WSLNOF | Novaggio Freiland       | 8°50'04.7'' E  | 46°01'28.8'' N | 1055          | slope          |             | 330°        |
| WSLOTF | Othmarsingen Freiland   | 8°13'23.1'' E  | 47°24'00.8'' N | 461           | mtohill        |             | 90°         |
| WSLSCF | Schänis Freiland        | 9°03'34.4'' E  | 47°09'04.4'' N | 626           | slope          |             | 45°         |
| WSLVOF | Vordemwald Freiland     | 7°54'39.8'' E  | 47°16'08.4'' N | 480           | slope          |             | 250°        |
| WSLVSF | Visp Freiland           | 7°50'33.4'' E  | 46°18'09.7'' N | 640           | flat           | 100°        |             |
| WYN    | Wynau                   | 7°47'14.6'' E  | 47°15'18.1'' N | 422           | valley         | 225°        | 135°        |
| ZER    | Zermatt                 | 7°45'11.2'' E  | 46°01'44.9'' N | 1638          | slope          | 225°        | 315°        |



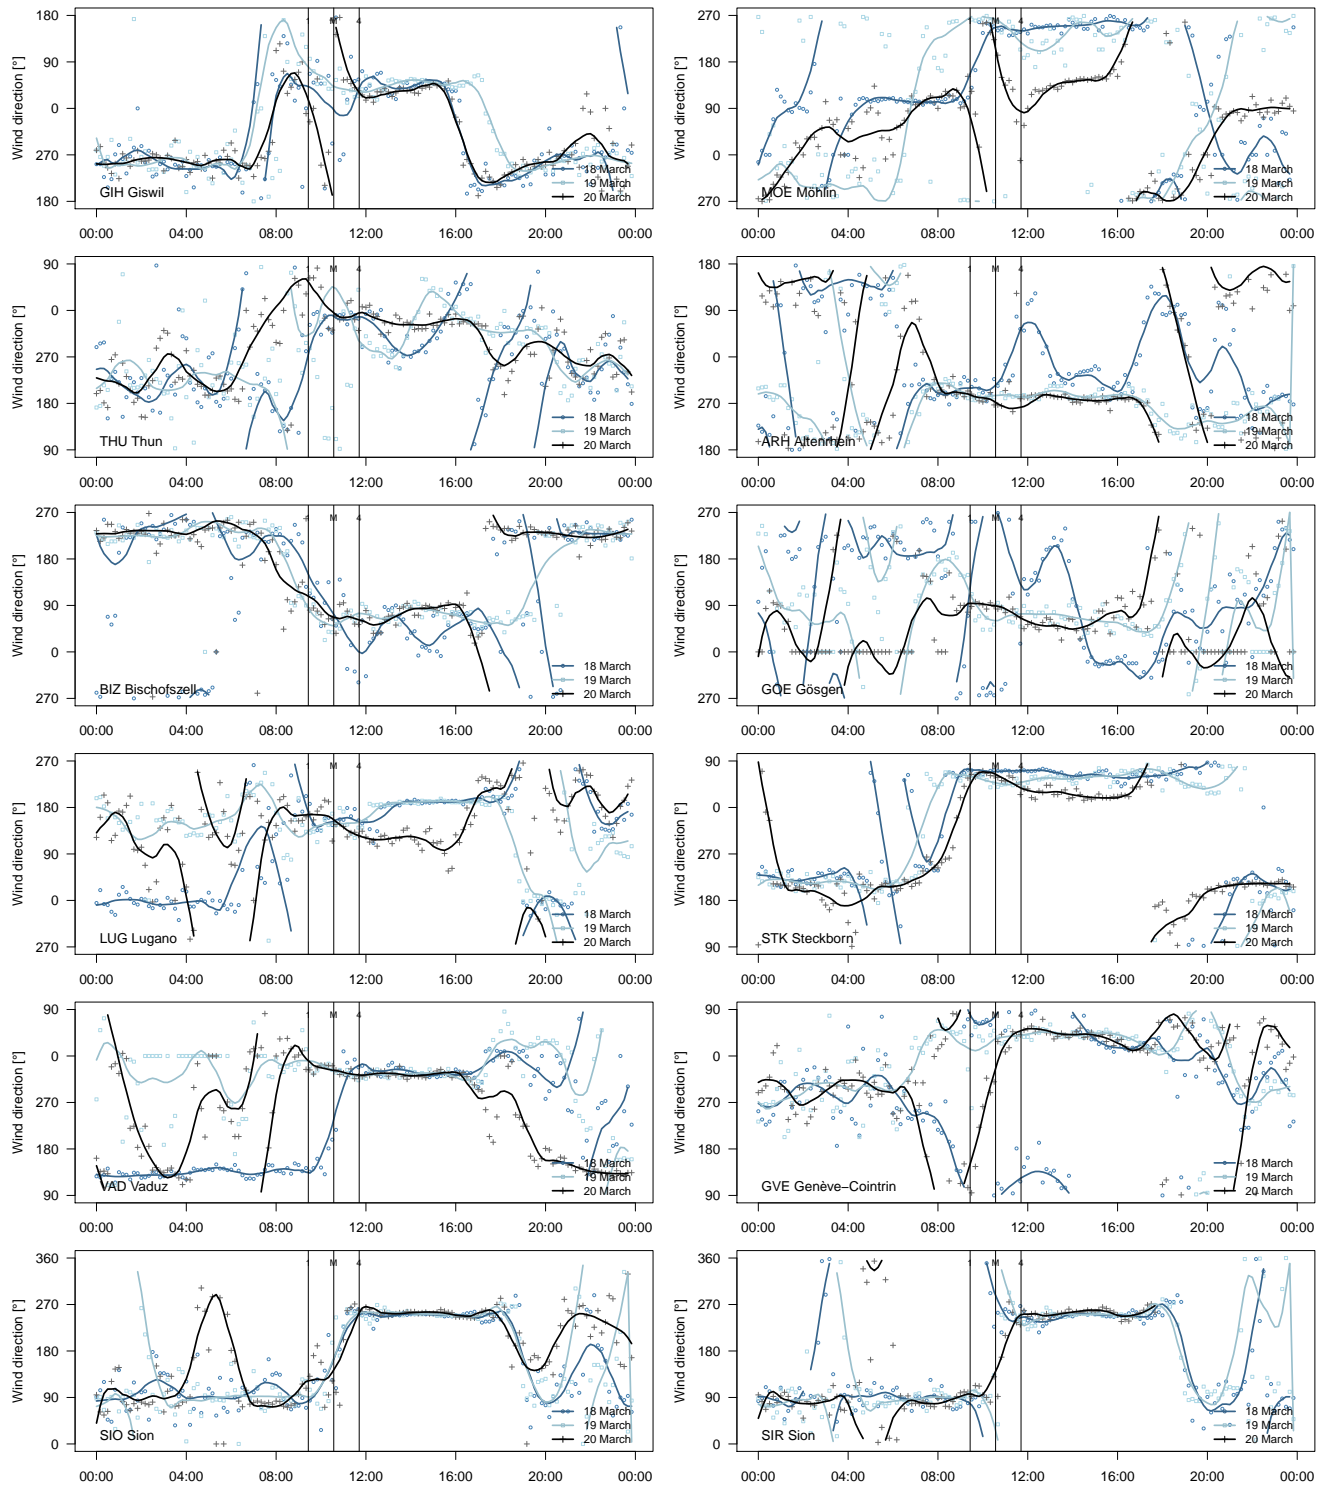

**Figure S1.** Wind direction evolution at MeteoSwiss sites classified as ‘flat’. Black line and gray symbols: day of eclipse (20 March 2015). Light blue line and symbols (19 March 2015) and dark blue line and symbols (18 March 2015): conditions on the days before for comparison. The timing of the first (1) and last (4) contact and the eclipse maximum (M) are shown with vertical lines. Site names and codes correspond to those given in Table S3. The bold lines are local polynomial regression (loess) fits. Note that the y-axis was shifted by 0, 90, 180 or 270° depending on site.

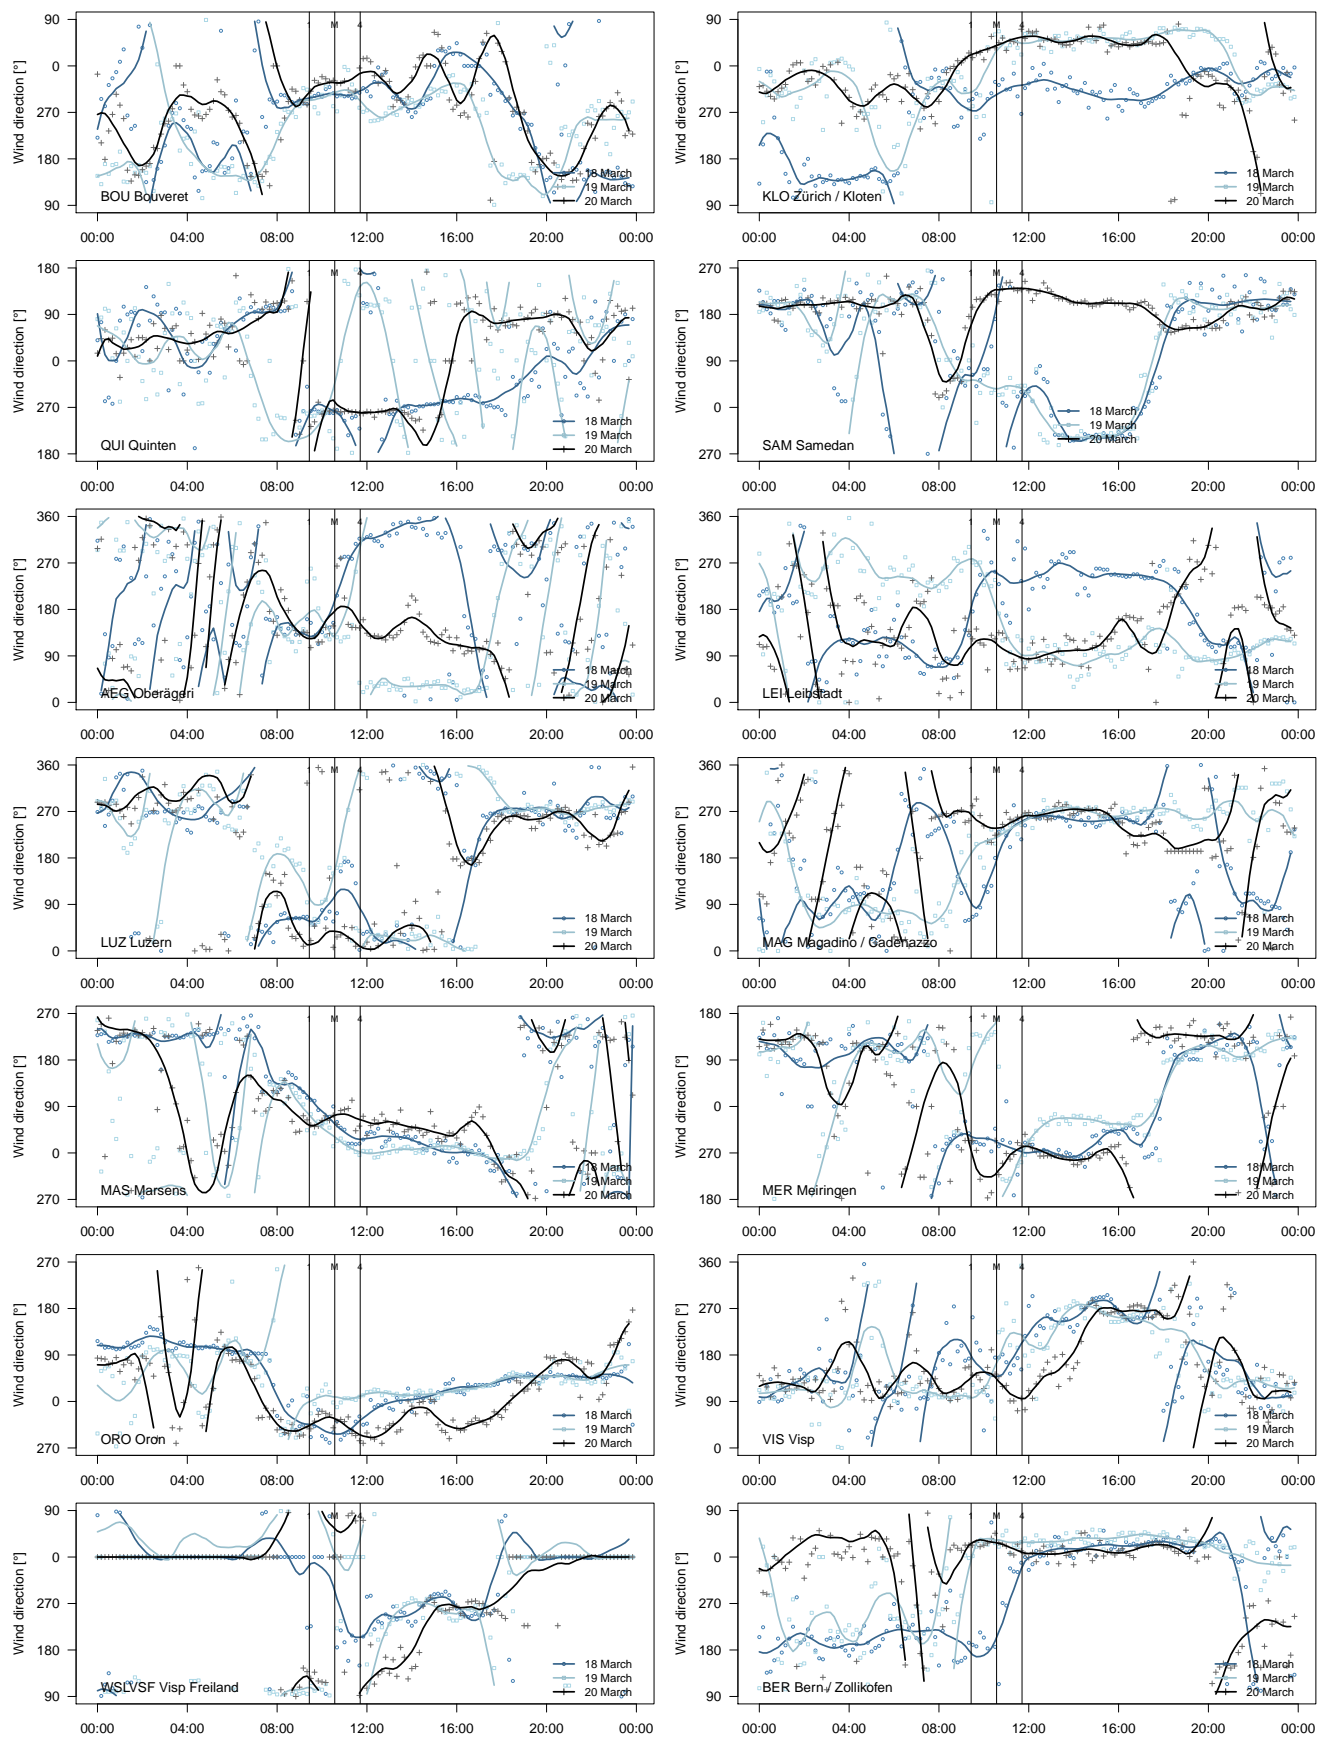

Figure S1. (continued)

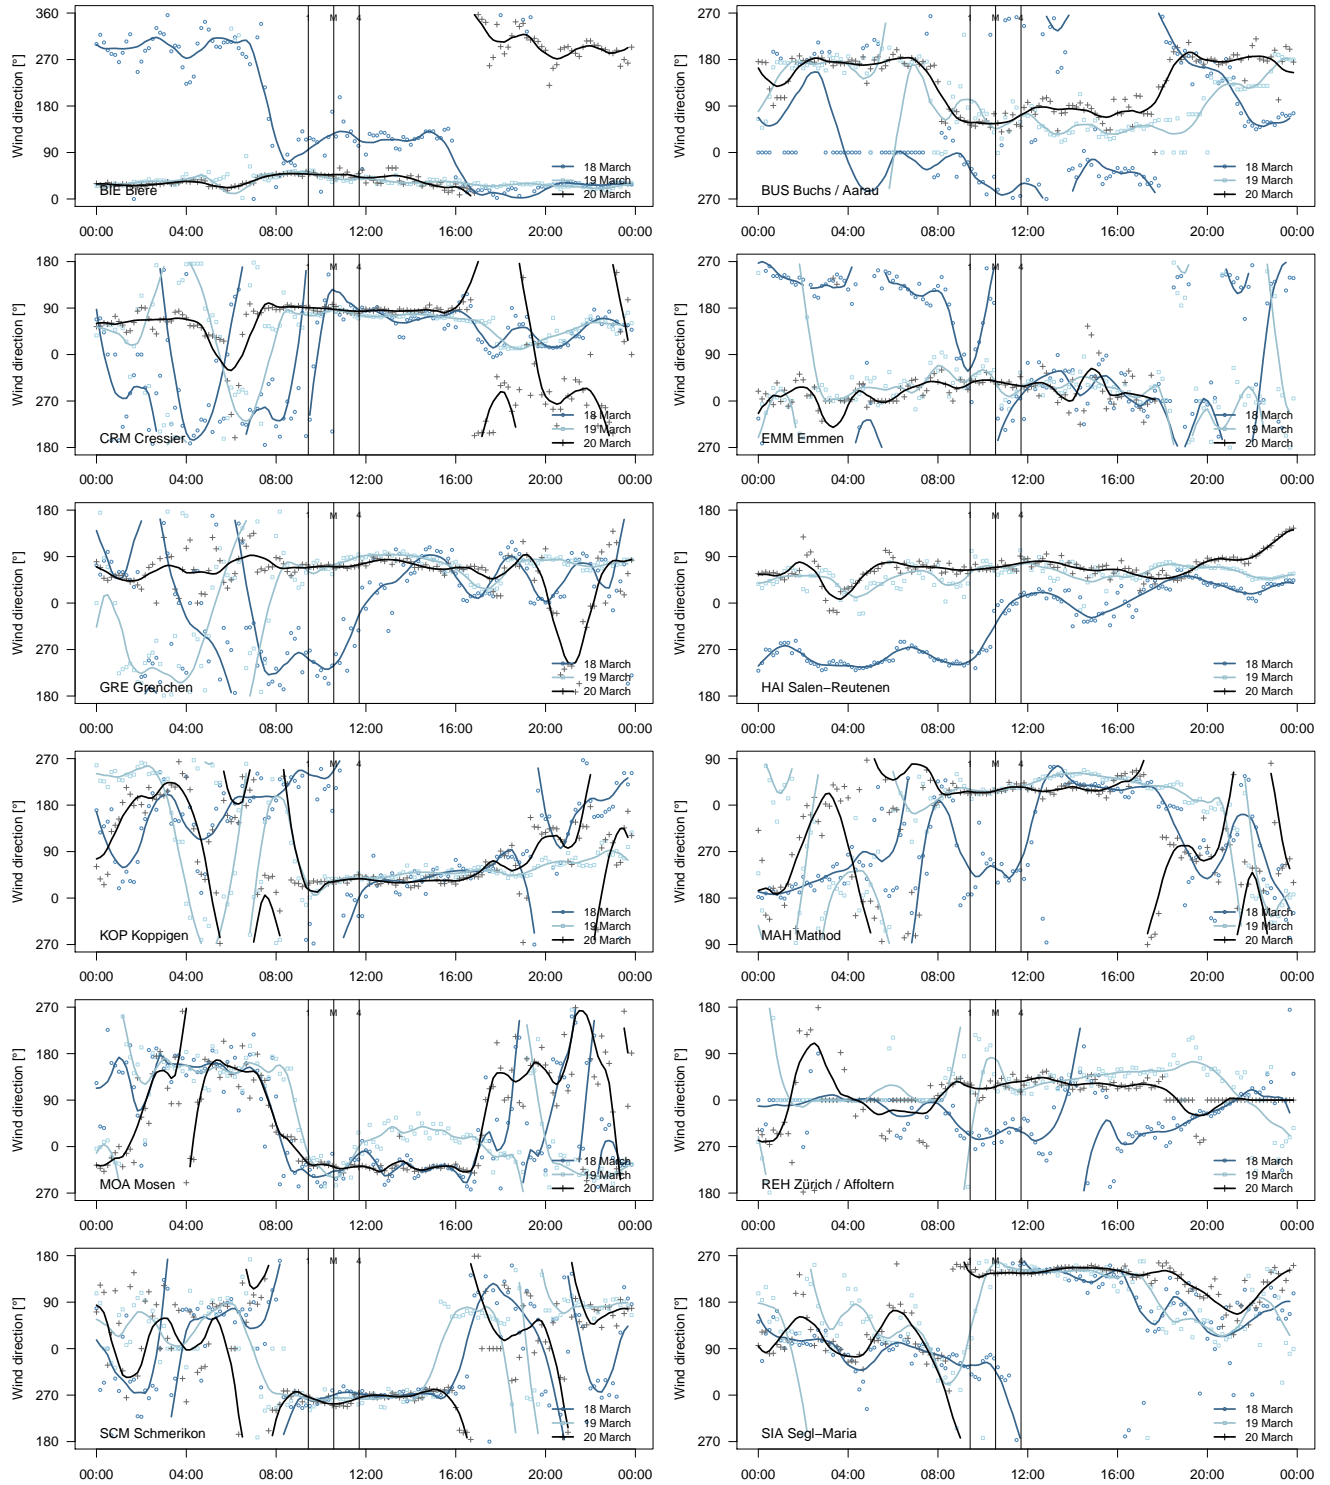

Figure S1. (continued)

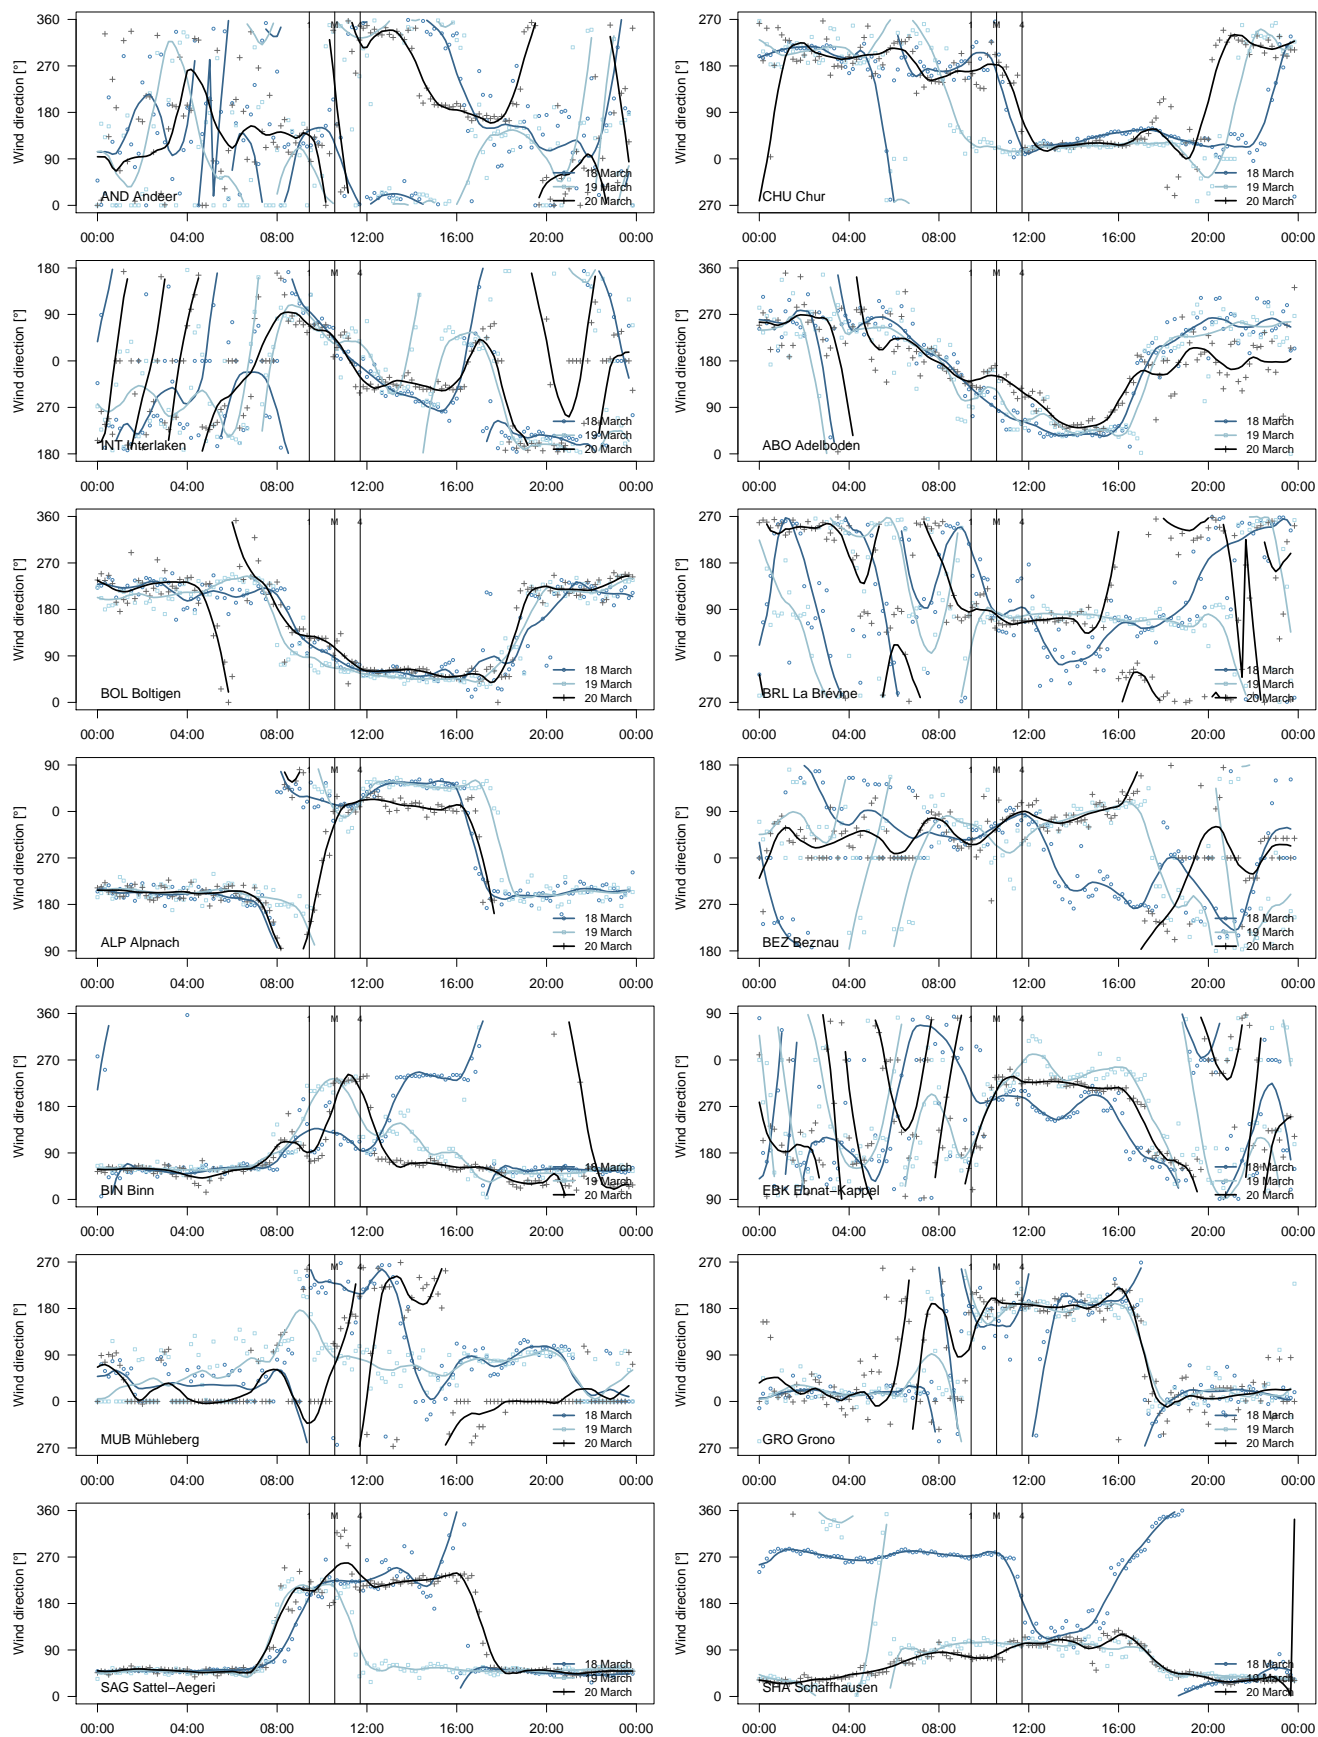

**Figure S2.** As Figure S1, but for sites classified as ‘valley’ sites in rather small valleys (otherwise a site was classified as ‘flat’).



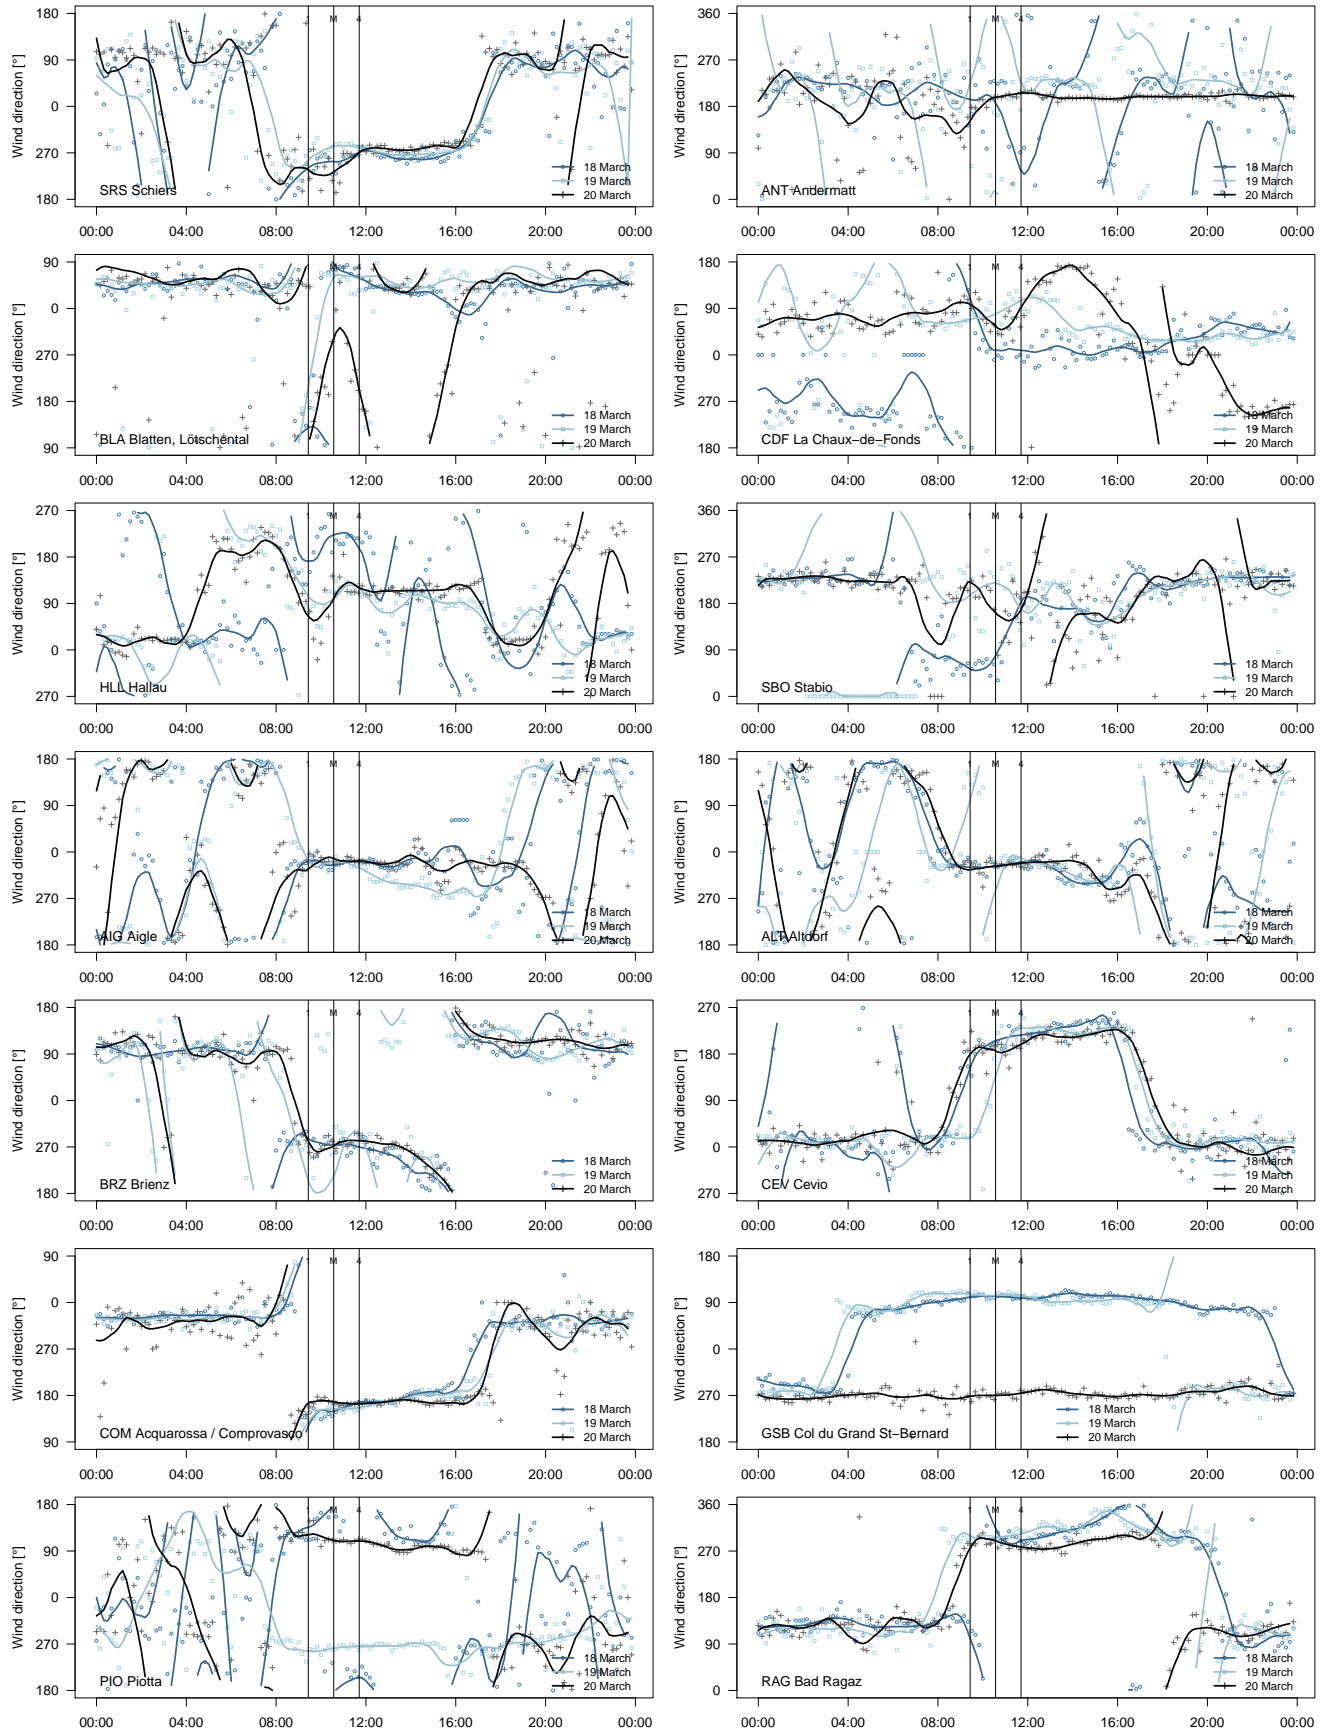

Figure S2. (continued)

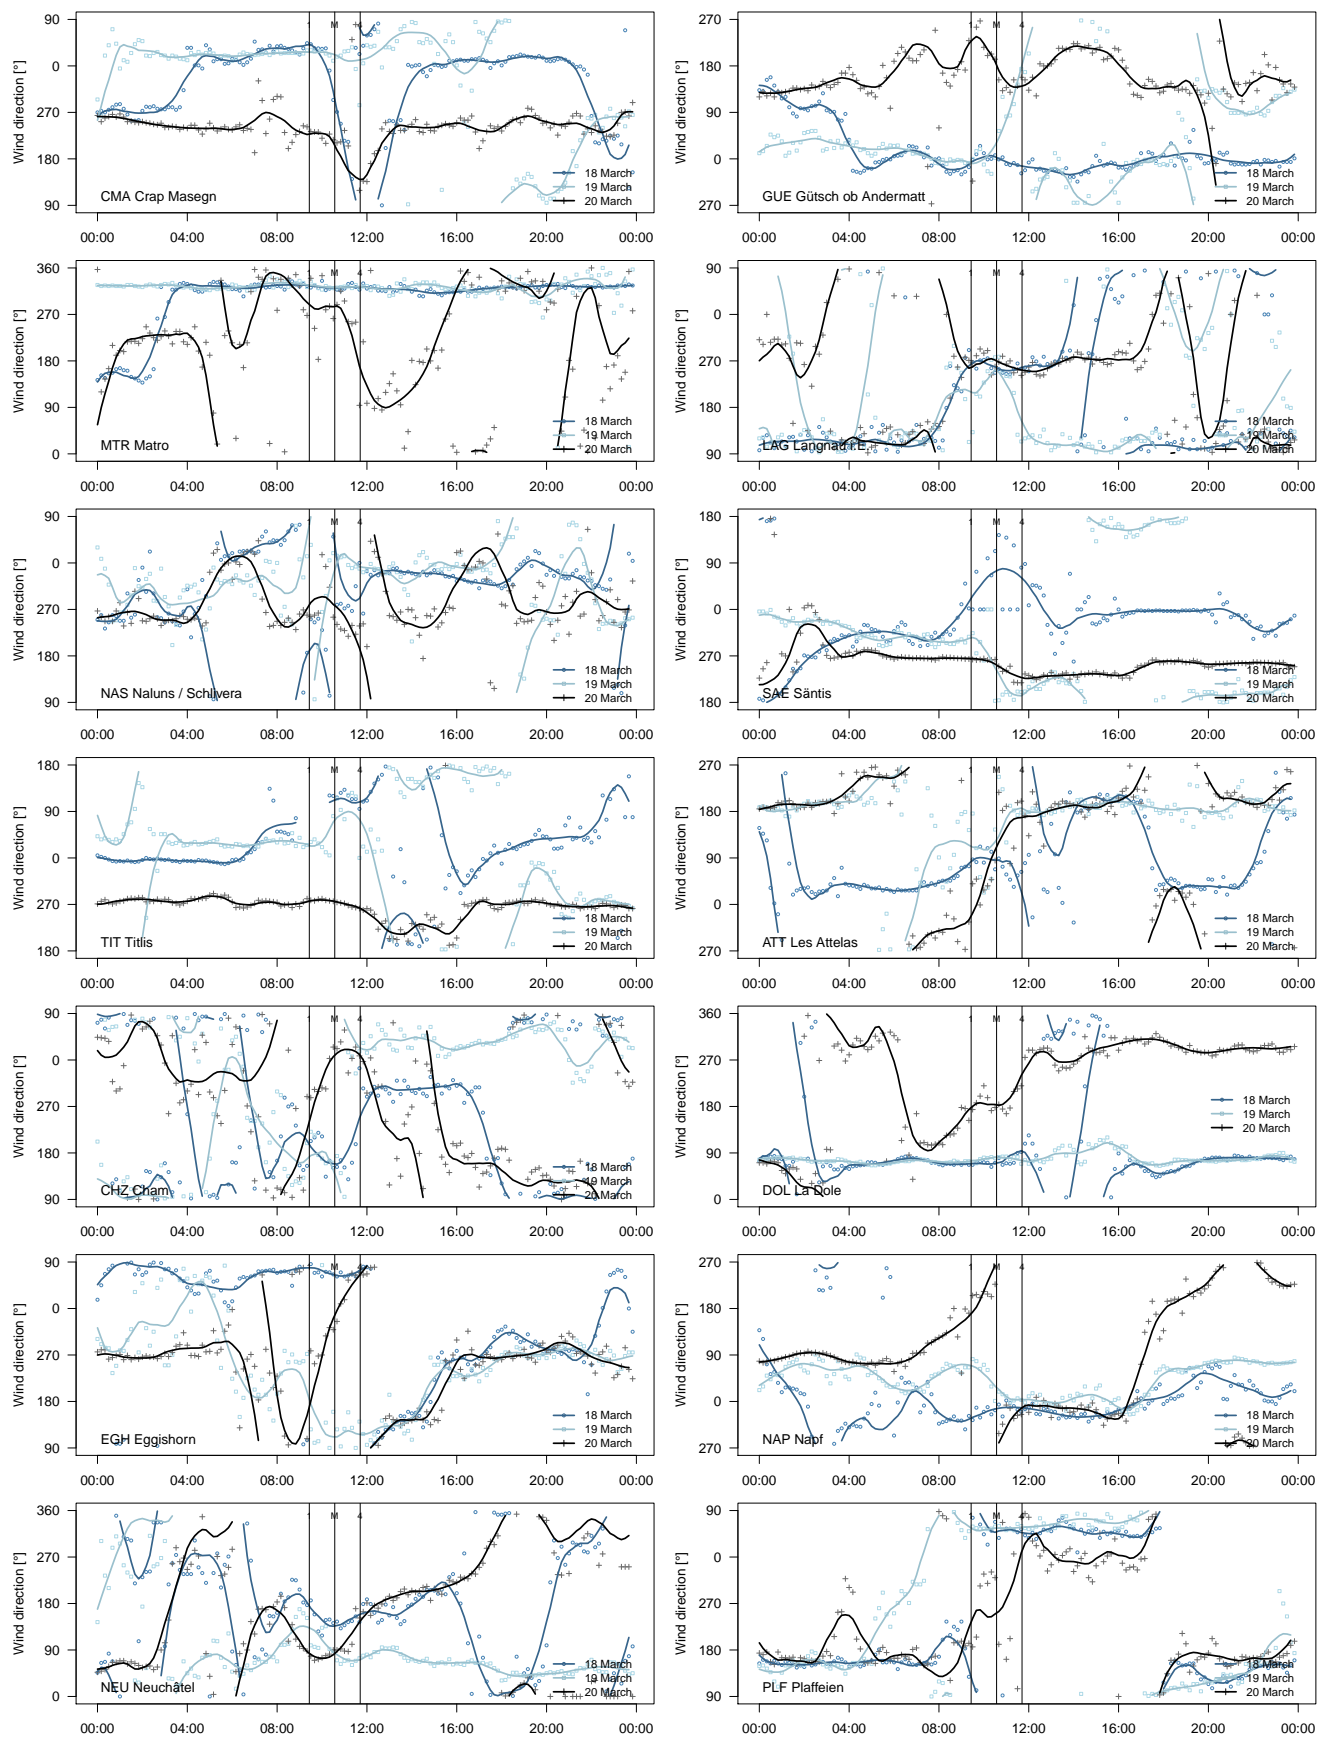

**Figure S3.** As Figure S1, but for sites classified as 'mountain or hilltop' sites.

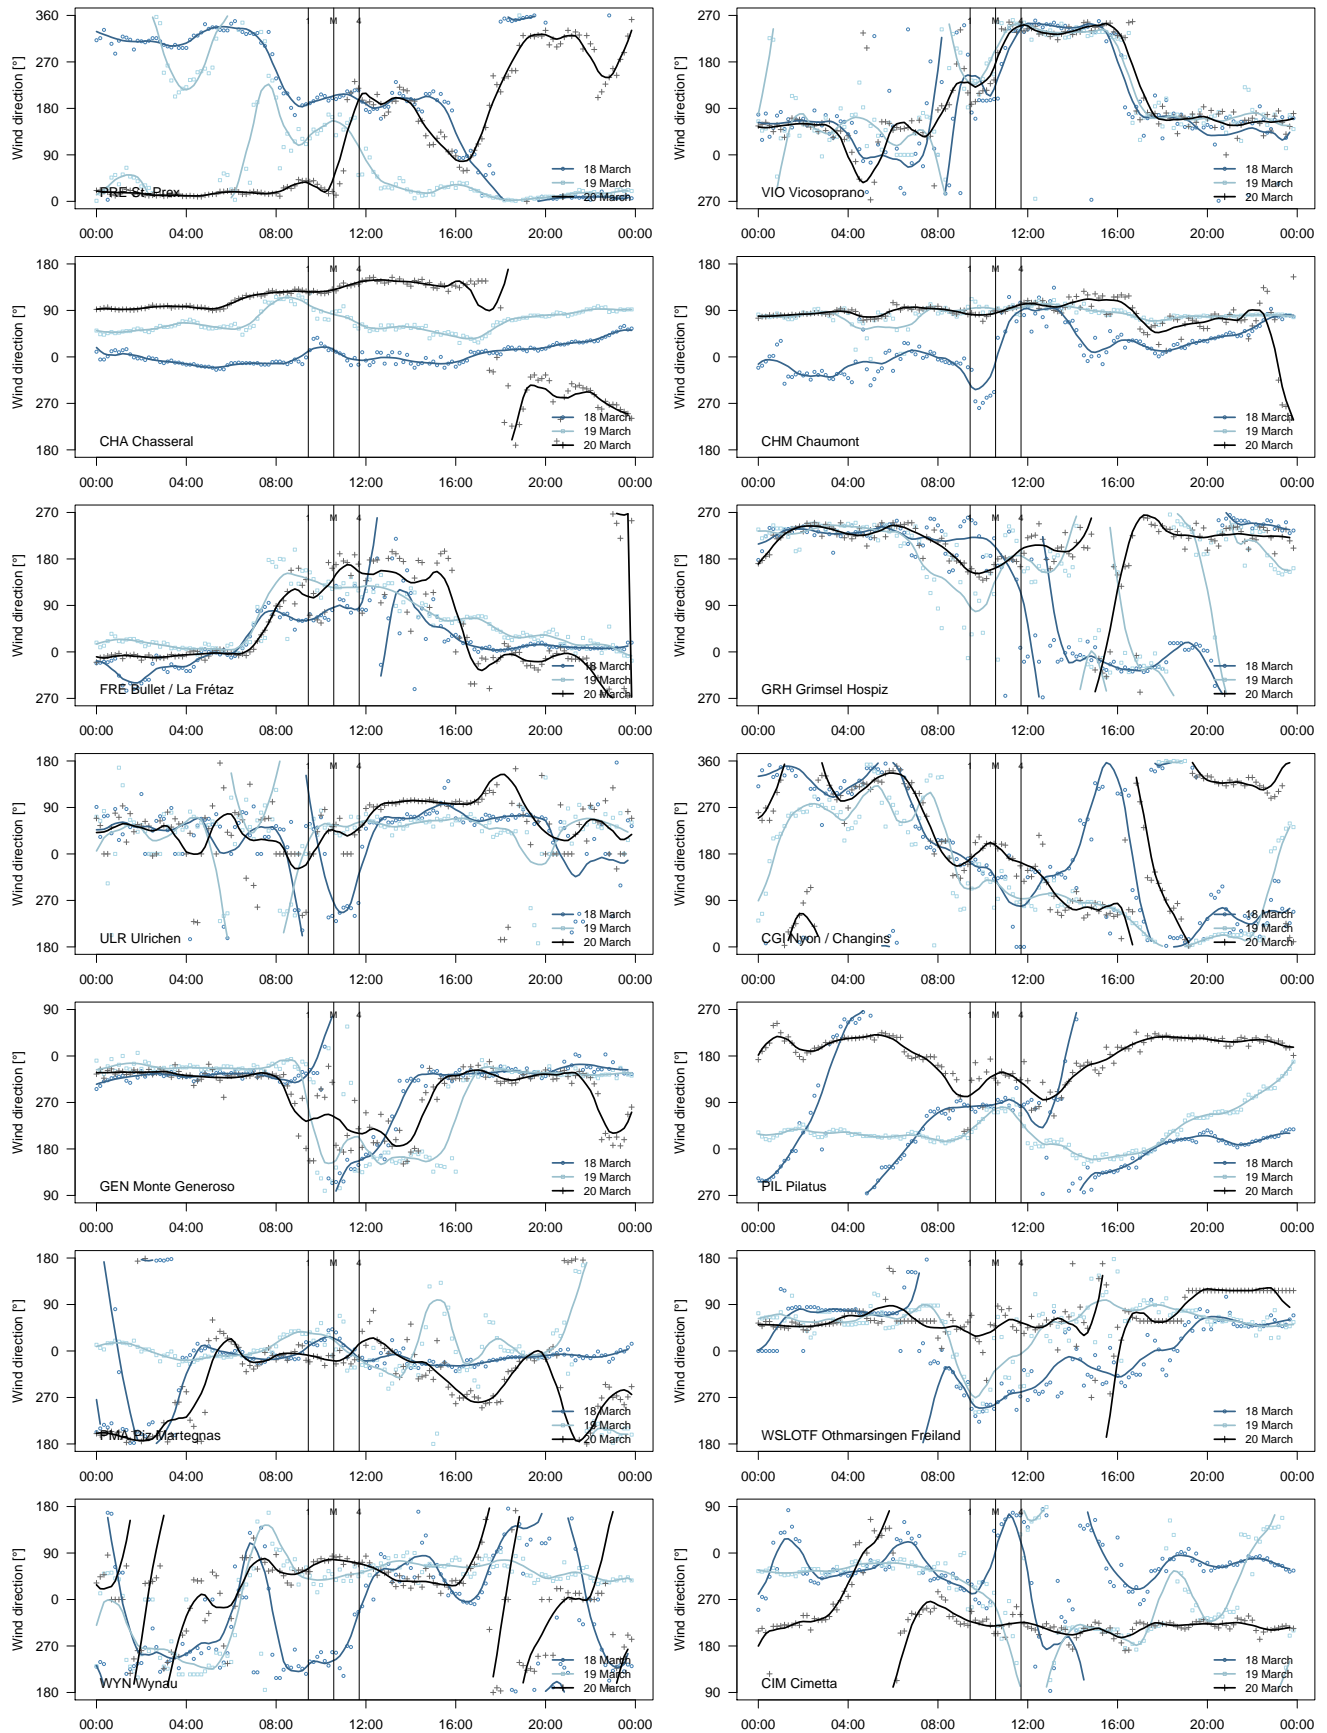

Figure S3. (continued)

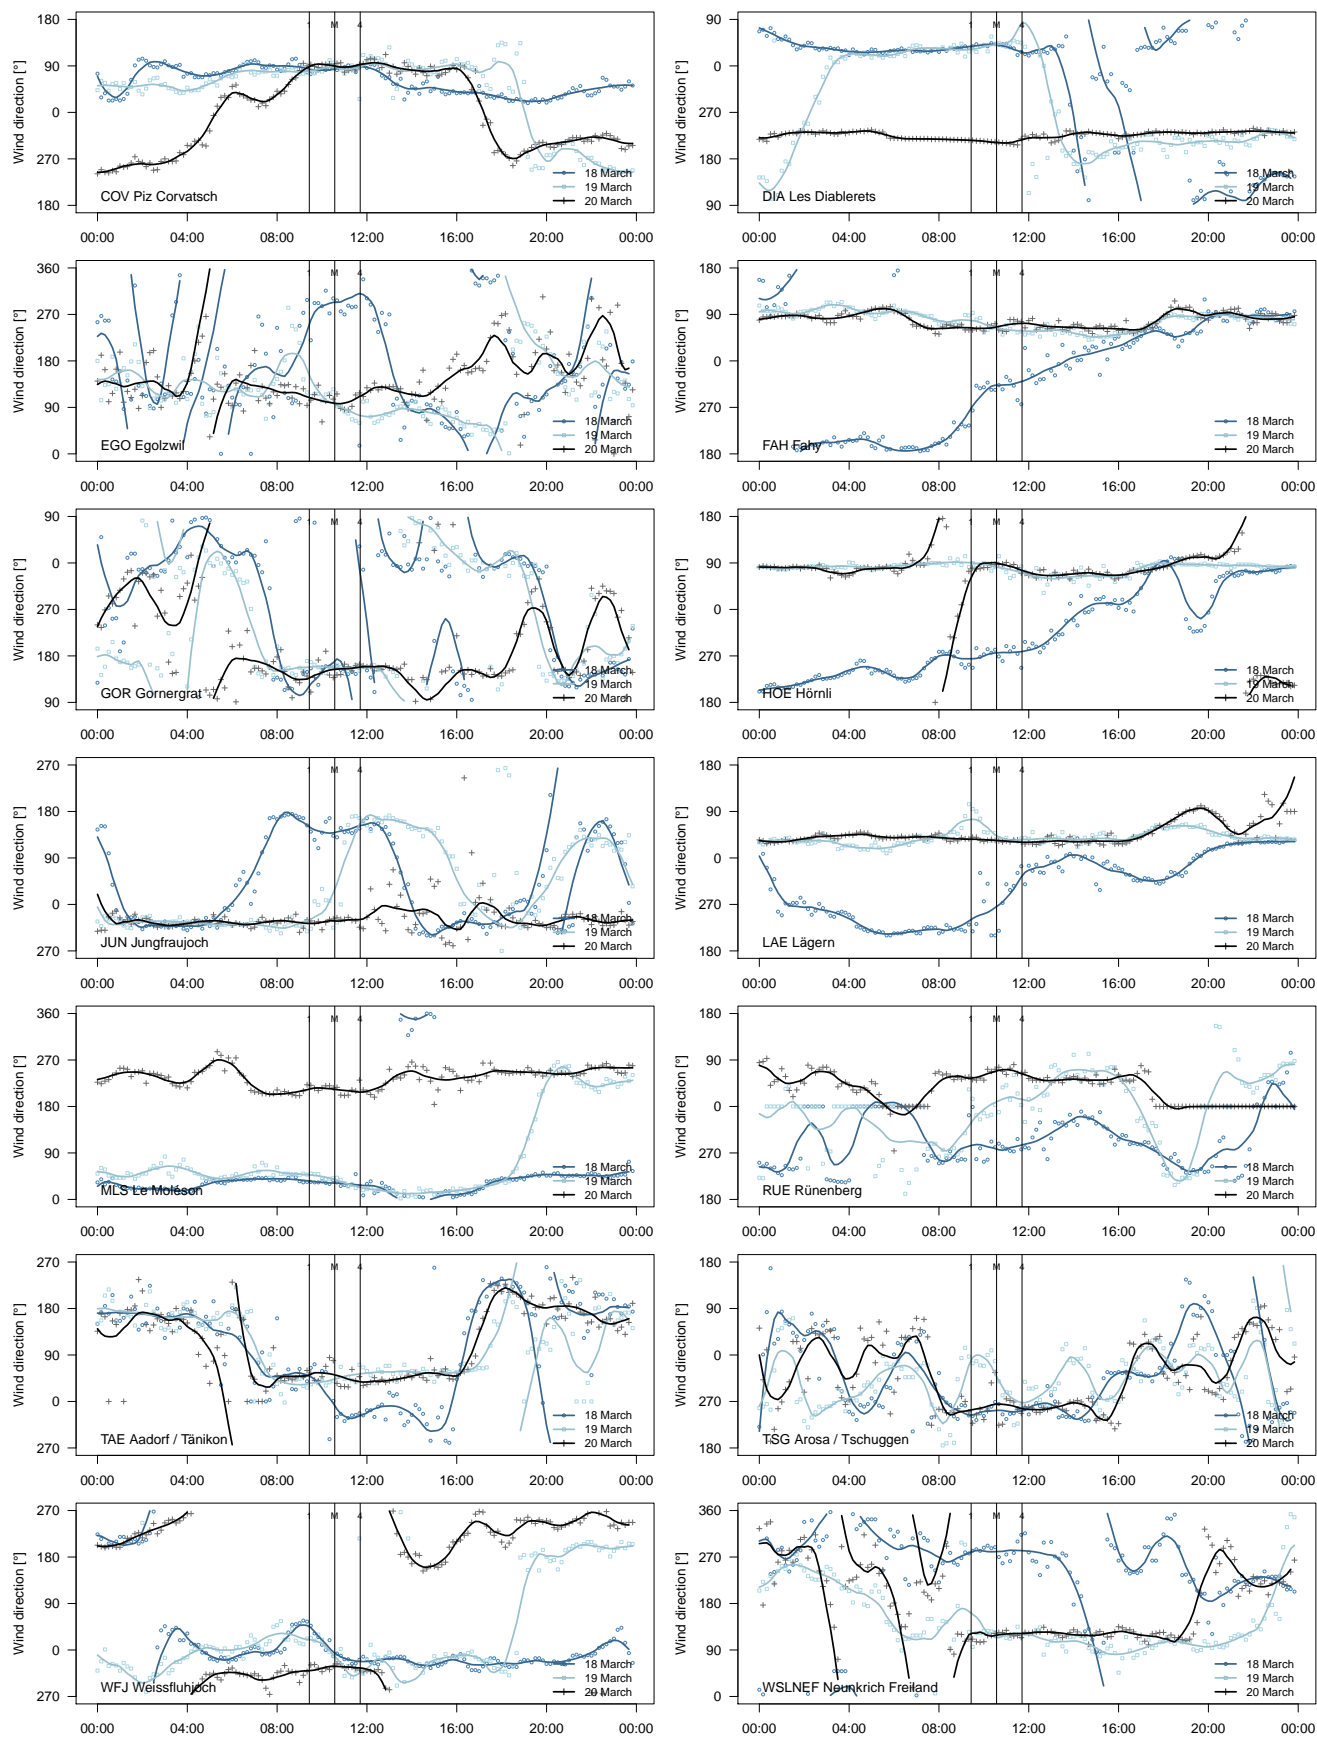

Figure S3. (continued)



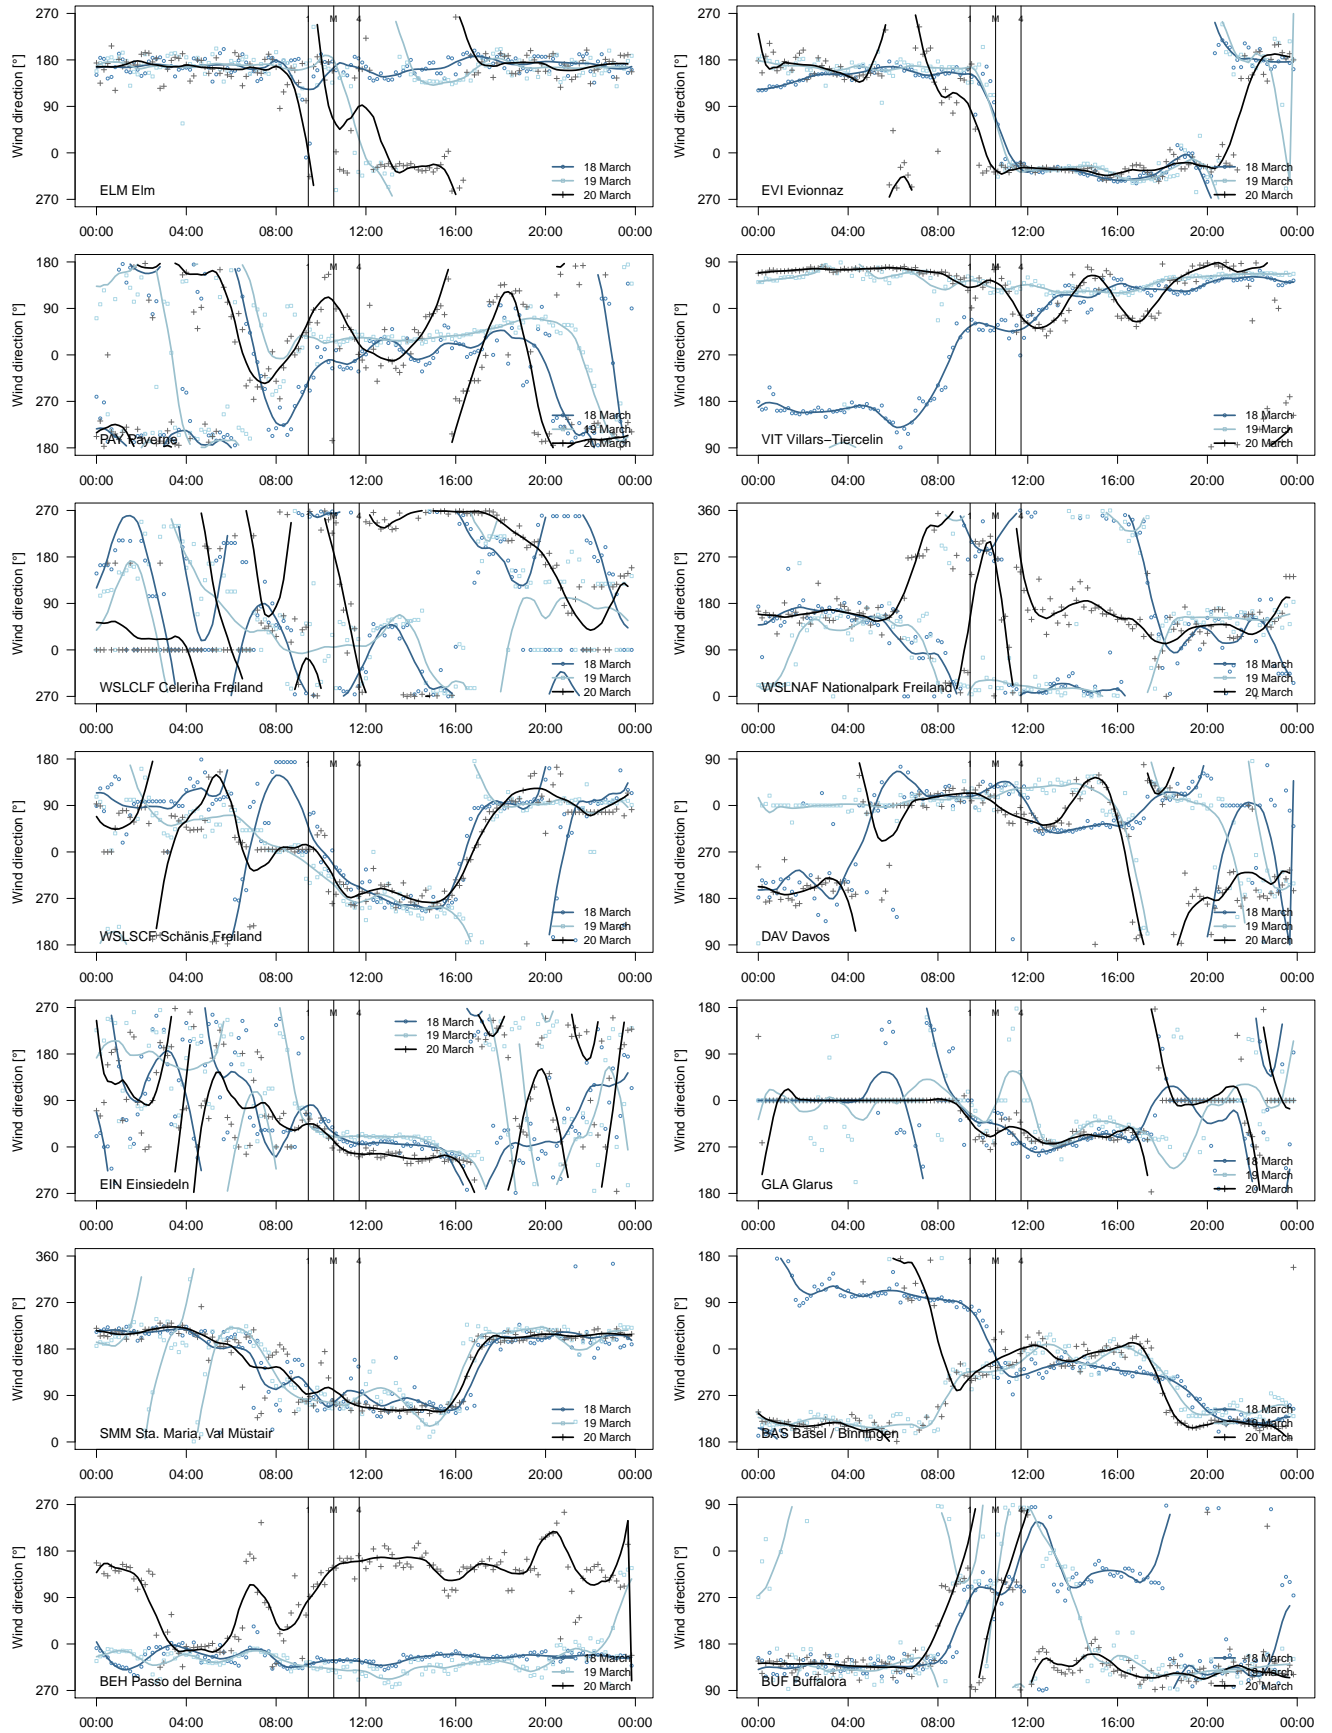

**Figure S4.** As Figure S1, but for sites classified as 'slope' sites.

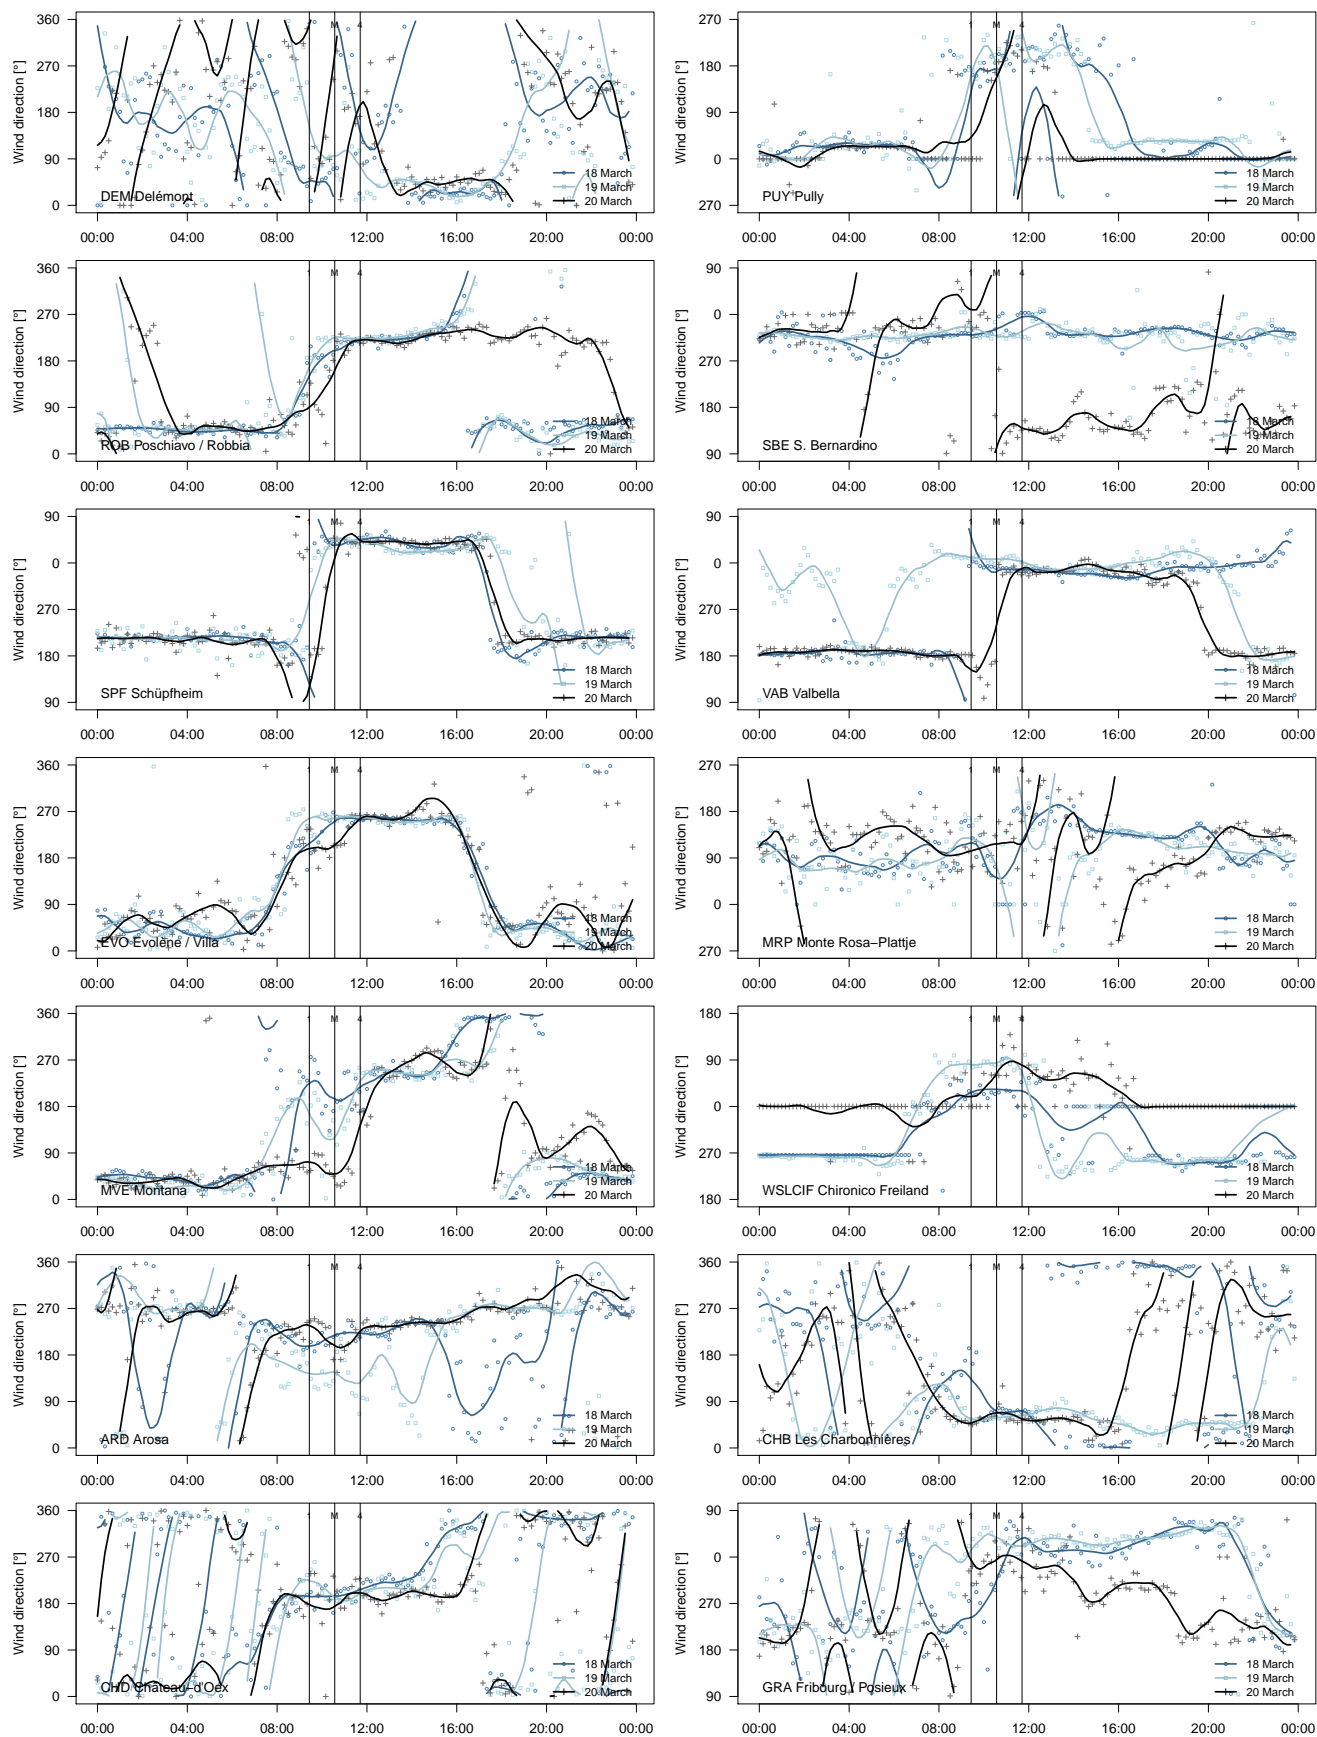

Figure S4. (continued)

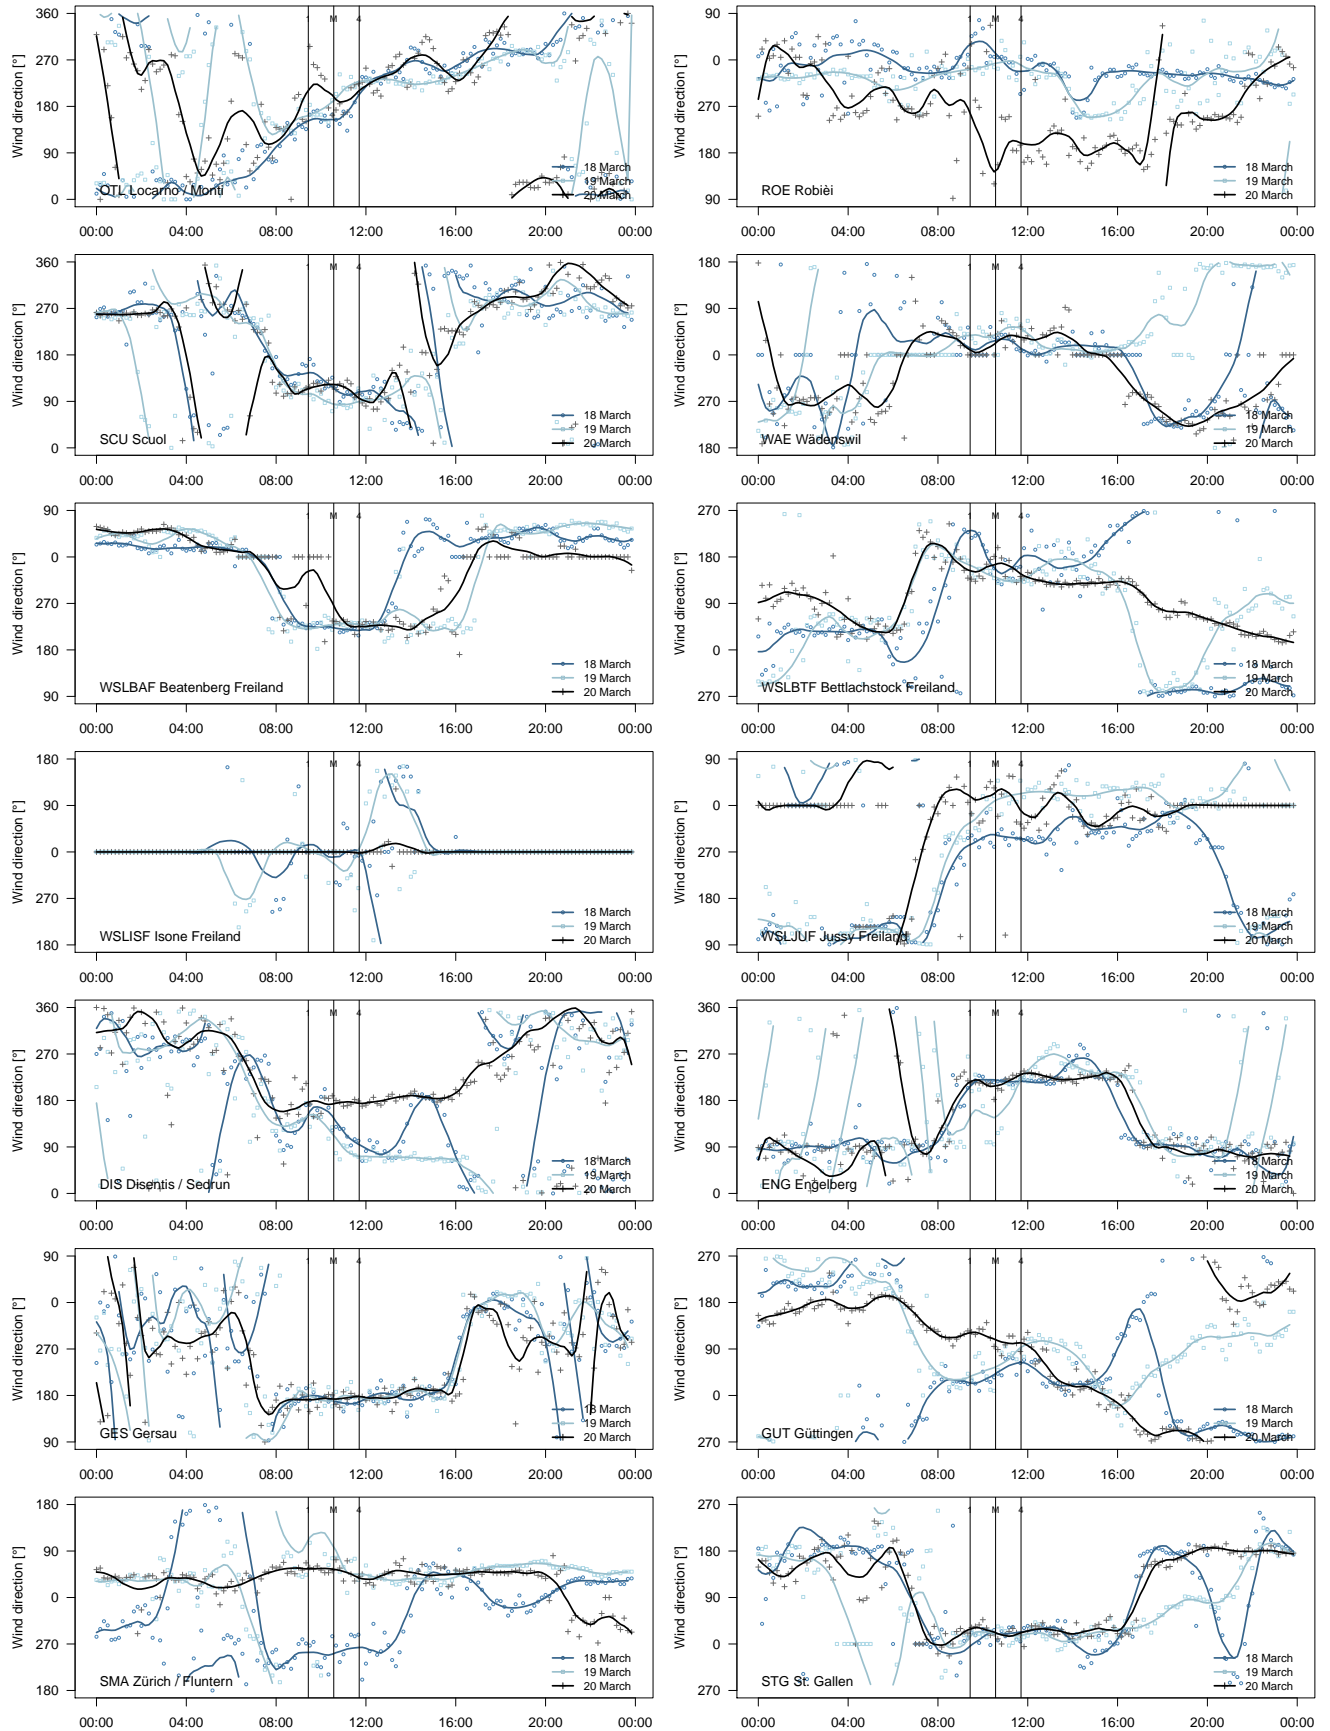

Figure S4. (continued)

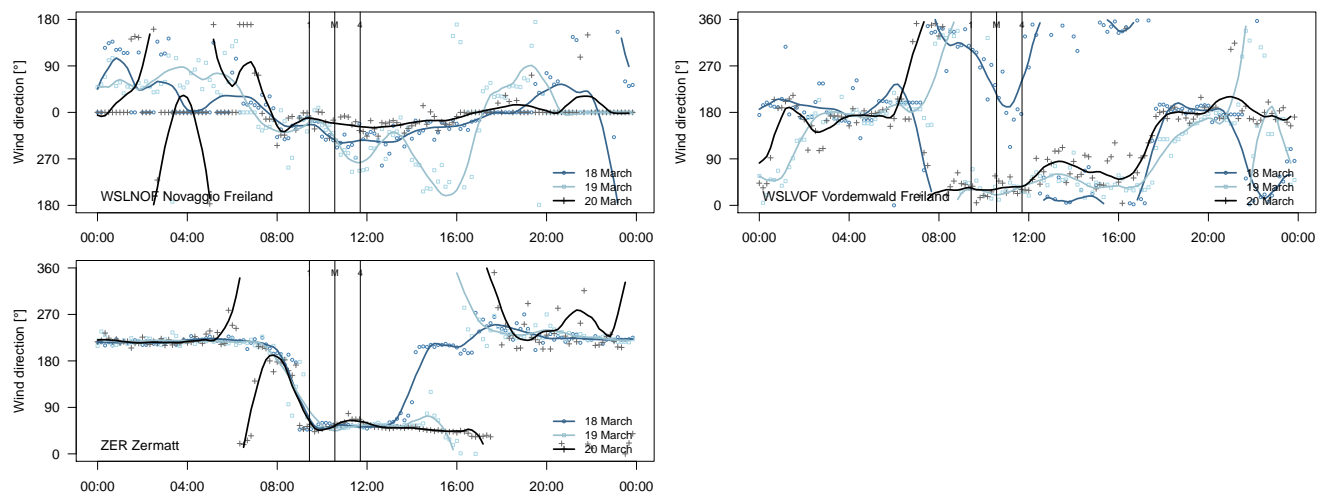

**Figure S4.** *(continued)*

## Remarks

1. Some sites in Figures S1–S4 show a constant wind direction ( $0^\circ$ ,  $270^\circ$ ) if the wind vane was blocked during low-wind or other blocking conditions, namely at night.
2. The span for the loess fits (bold lines in Figures S1–S4) was set to 4 hours
3. The decision where to interrupt the loess fit lines was made automatically: if the magnitude of directional change between two data points was  $200^\circ$  or more, then the line was interrupted. Lines were also interrupted when data were missing.
